# Supplementary material for: Palladium on carbon-catalyzed synthesis of 2- and 2,3-substituted indoles under heterogeneous conditions
Source: Royal Society of Chemistry journal article supplement (doi:10.1039/c004939e), 2010-01-01

## Electronic Supplementary Information

### **Palladium on Carbon-catalyzed Synthesis of 2- and 2,3-Substituted Indoles under Heterogeneous Conditions**

Yasunari Monguchi,<sup>a</sup> Shigeki Mori,<sup>a</sup> Satoka Aoyagi,<sup>a</sup> Azusa Tsutsui,<sup>a</sup>  
Tomohiro Maegawa,<sup>a,b</sup> and Hironao Sajiki\*<sup>a</sup>

<sup>a</sup>*Laboratory of Organic Chemistry, Department of Organic and Medicinal Chemistry,  
Gifu Pharmaceutical University, 1-25-4 Daigaku-nishi, Gifu 501-1196, Japan*

<sup>b</sup>*Current address: Graduate School of Pharmaceutical Sciences, Osaka University 1-6 Yamada-oka, Suita,  
Osaka 565-0871, Japan*

## General methods

All reagents were obtained from commercial sources and used without further purification. Analytical thin-layer chromatography (TLC) was carried out on pre-coated Silica gel 60 F-254 plates (32–63  $\mu\text{m}$  particle size) and visualized with UV light (254 nm). The 10% Pd/C was obtained from the N.E. Chemcat Co. Flash column chromatography was performed with Silica gel 60 (40–63  $\mu\text{m}$  particle size, Merck & Co., Inc.) or Silica gel 60N (100–210  $\mu\text{m}$ , Kanto Chemical Co., Inc.).  $^1\text{H}$  and  $^{13}\text{C}$  NMR spectra were recorded by a JEOL JNM EX-400 or AL-400 spectrometer (400 MHz for  $^1\text{H}$  NMR and 100 MHz for  $^{13}\text{C}$  NMR) using  $\text{CDCl}_3$  as the solvent. Chemical shifts ( $\delta$ ) are expressed in ppm based on internal standards (TMS for  $^1\text{H}$  NMR and  $\text{CDCl}_3$  for  $^{13}\text{C}$  NMR). The electron impact (EI) and fast-atom bombardment (FAB) mass spectra were taken using a JEOL JMS-SX 102A instrument.

1-Boc- (**1b**),<sup>1</sup> 1-acetyl- (**1c**),<sup>2</sup> 1-Cbz- (**1d**),<sup>3</sup> and 1-tosyl-2-iodoanilines (**1e**)<sup>2</sup> were prepared according to the reported procedures. 1-tosyl-2-iodo-4-methoxycarbonylaniline (**1f**) was synthesized by the *N*-tosylation of 2-iodo-4-methoxycarbonylaniline using tosylchloride, *N,N*-dimethylpyridine and pyridine.

### 1-Tosyl-2-iodo-4-methoxycarbonylaniline (**1f**)

$^1\text{H}$  NMR:  $\delta$  8.54 (s, 1H), 7.93 (d,  $J = 8.4$  Hz, 1H), 7.69 (d,  $J = 8.4$  Hz, 2H), 7.66 (d,  $J = 8.4$  Hz, 1H), 7.24 (d,  $J = 8.4$  Hz, 2H), 7.10 (br s, 1H), 3.88 (s, 3H), 2.38 (s, 3H);  $^{13}\text{C}$  NMR:  $\delta$  164.9, 144.7, 141.4, 140.5, 135.5, 130.8, 129.8, 127.6, 127.4, 119.5, 89.9, 52.3, 21.6; MS (FAB, NBA)  $m/z$  432 [(M+H)<sup>+</sup>, 17%], 432 (17%); HRMS (FAB, NBA) Calcd for  $\text{C}_{15}\text{H}_{15}\text{NO}_4\text{SI}$  [(M+H)<sup>+</sup>] 431.9769. Found 431.9772.

### General procedure of the LiCl-free Pd/C-catalyzed annulation of alkynes with *N*-Ts-2-iodoaniline (for Table 5)

A mixture of *N*-Ts-2-iodoaniline (0.250 mmol), alkyne (0.300 mmol), 10% Pd/C (8.0 mg, 3 mol % of *N*-Ts-2-iodoaniline) and NaOAc (22.5 mg, 0.275 mmol) in NMP (1.00  $\text{cm}^3$ ) in a 15  $\text{cm}^3$ -test tube was sealed with a septum and the air inside was replaced with Ar by five vacuum/Ar (balloon) cycles. The mixture was stirred at 110–130  $^\circ\text{C}$  for 24 h using Chemist Plaza personal organic synthesizer (Shibata Scientific Technology, Ltd., Tokyo). The suspension was vigorously stirred with additional EtOAc (40  $\text{cm}^3$ ) and saturated  $\text{NH}_4\text{Cl}$  solution (10  $\text{cm}^3$ ), and filtered through a membrane filter (Millipore, Millex<sup>®</sup>-LH, 0.45  $\mu\text{m}$ ). The filtered aqueous layers were separated and the water layer was extracted with another EtOAc (20  $\text{cm}^3$ ). The EtOAc layer was combined with the filtered organic layer and washed with saturated  $\text{NH}_4\text{Cl}$  solution (20  $\text{cm}^3 \times 2$ ),  $\text{H}_2\text{O}$  (5  $\text{cm}^3 \times 2$ ), and brine (5  $\text{cm}^3$ ), and dried over anhydrous  $\text{Na}_2\text{SO}_4$ , filtered, and concentrated *in vacuo*. The residue was purified by silica gel column

chromatography.

**1-Boc-2,3-diphenylindole (2b)**<sup>4</sup>

<sup>1</sup>H NMR:  $\delta$  8.32 (d,  $J$  = 8.4 Hz, 1H), 7.57 (d,  $J$  = 7.9 Hz, 1H), 7.36 (t,  $J$  = 7.9 Hz, 1H), 7.25–7.18 (m, 11H), 1.2 (s, 9H); <sup>13</sup>C NMR:  $\delta$  150.2, 136.6, 135.7, 133.9, 133.4, 130.3, 130.3, 130.1, 129.3, 128.1, 127.6, 127.4, 126.6, 124.7, 123.0, 121.9, 119.6, 115.2, 83.2, 27.4; MS (EI)  $m/z$  369 ( $M^+$ , 20%), 313 (45%), 269 (100%), 57 (15%); HRMS (EI) Calcd for C<sub>25</sub>H<sub>23</sub>NO<sub>2</sub> ( $M^+$ ) 369.1729. Found 369.1735.

**1-Acetyl-2,3-diphenylindole (2c)**<sup>5</sup>

<sup>1</sup>H NMR:  $\delta$  8.47 (dd,  $J$  = 8.0, 0.8 Hz, 1H), 7.55 (td,  $J$  = 8.4, 0.8 Hz, 1H), 7.42–7.20 (m, 12H), 2.0 (s, 3H); <sup>13</sup>C NMR:  $\delta$  172.3, 137.5, 137.8, 133.7, 131.5, 130.8, 130.0, 129.3, 129.0, 127.6, 126.2, 124.5, 124.5, 124.1, 120.3, 116.9, 28.6; MS (EI)  $m/z$  311 ( $M^+$ , 41%), 269 (100%), 84 (58%); HRMS (EI) Calcd for C<sub>22</sub>H<sub>17</sub>NO ( $M^+$ ) 311.1313. Found 311.1310.

**2,3-Diphenyl-1-tosylindole (2e)**<sup>6</sup>

<sup>1</sup>H NMR:  $\delta$  8.41 (d,  $J$  = 8.8 Hz, 1H), 7.48 (d,  $J$  = 8.0 Hz, 1H), 7.41 (dd,  $J$  = 7.4, 7.4 Hz, 1H), 7.34–7.17 (m, 11H), 7.09–7.06 (m, 4H); <sup>13</sup>C NMR:  $\delta$ ; 144.5, 137.2, 136.8, 135.2, 132.5, 132.0, 130.8, 130.4, 129.7, 129.2, 128.4, 128.1, 127.2, 126.9, 126.8, 125.1, 124.7, 124.1, 120.0, 116.1, 21.4; MS (EI)  $m/z$  423 ( $M^+$ , 39%), 268 (100%); HRMS (EI) Calcd for C<sub>27</sub>H<sub>21</sub>NO<sub>2</sub>S ( $M^+$ ) 423.1288. Found 423.1293.

**2,3-Dipentyl-1-tosylindole (2f)**

<sup>1</sup>H NMR:  $\delta$  8.17 (dd,  $J$  = 7.2, 1.6 Hz, 1H), 7.50 (d,  $J$  = 8.6 Hz, 2H), 7.36 (dd,  $J$  = 6.8, 1.6 Hz, 1H), 7.24–7.17 (m, 2H), 7.08 (d,  $J$  = 8.6 Hz, 2H), 2.94 (t,  $J$  = 7.8 Hz, 2H), 2.57 (t,  $J$  = 7.8 Hz, 2H), 2.26 (s, 3H), 1.70 (m, 2H), 1.51 (m, 2H), 1.36–1.20 (m, 8H), 0.91–0.82 (m, 6H); <sup>13</sup>C NMR:  $\delta$  144.1, 137.8, 136.9, 135.9, 131.1, 129.4, 126.1, 123.7, 123.3, 121.8, 118.5, 115.4, 31.8, 31.6, 30.7, 29.5, 26.5, 24.1, 22.4, 22.4, 21.3, 14.0, 13.9; MS (EI)  $m/z$  411 ( $M^+$ , 100%), 256 (41%), 91 (25%); HRMS (EI) Calcd for C<sub>25</sub>H<sub>33</sub>NO<sub>2</sub>S ( $M^+$ ) 411.2232. Found 411.2239.

**2,3-Diethyl-1-tosylindole (2g)**

<sup>1</sup>H NMR:  $\delta$  8.17 (dd,  $J$  = 7.2, 1.6 Hz, 1H), 7.55 (d,  $J$  = 8.4 Hz, 2H), 7.40 (dd,  $J$  = 6.8, 2.0 Hz, 1H), 7.27–7.20 (m, 2H), 7.13 (d,  $J$  = 8.4 Hz, 2H), 2.99 (q,  $J$  = 7.6 Hz, 2H), 2.61 (q,  $J$  = 7.6 Hz, 2H), 1.30 (t,  $J$  = 7.6 Hz, 3H), 1.15 (t,  $J$  = 7.6 Hz, 3H); <sup>13</sup>C NMR:  $\delta$  144.2, 138.5, 136.8, 136.2, 130.6, 130.0, 126.1, 123.8, 123.2, 122.5, 118.4, 115.2, 21.4, 19.7, 17.4, 15.7, 14.7; MS (EI)  $m/z$  327 ( $M^+$ , 54%), 172 (100%), 91 (20%); HRMS (EI) Calcd for C<sub>19</sub>H<sub>21</sub>NO<sub>2</sub>S ( $M^+$ ) 327.1293.

Found 372.1298.

### **2,3-Dipropy-1-tosylindole (2h)<sup>6</sup>**

<sup>1</sup>H NMR:  $\delta$  8.15 (dd,  $J = 8.4, 0.8$  Hz, 1H), 7.51 (d,  $J = 8.4$  Hz, 2H), 7.37 (dd,  $J = 8.0, 2.4$  Hz, 1H), 7.25–7.18 (m, 2H), 7.10 (d,  $J = 8.4$  Hz, 2H), 2.93 (t,  $J = 7.6$  Hz, 2H), 2.56 (t,  $J = 7.6$  Hz, 2H), 2.27 (s, 3H), 1.73 (q,  $J = 7.6$  Hz, 2H), 1.55 (q,  $J = 7.6$  Hz, 2H), 0.98 (t,  $J = 7.6$  Hz, 3H), 0.85 (t,  $J = 7.6$  Hz, 3H); <sup>13</sup>C NMR:  $\delta$  144.2, 137.7, 136.9, 135.9, 131.1, 129.4, 126.0, 123.8, 123.3, 121.7, 118.5, 115.4, 28.4, 26.2, 24.2, 23.0, 21.4, 14.0, 13.8; MS (EI)  $m/z$  355 ( $M^+$ , 100%), 326 (46%), 200 (85%), 91 (35%); HRMS (EI) Calcd for C<sub>21</sub>H<sub>25</sub>NO<sub>2</sub>S ( $M^+$ ) 355.1606. Found 355.1599.

### **2-Phenyl-1-tosylindole (2i)<sup>7</sup>**

<sup>1</sup>H NMR:  $\delta$  8.31 (d,  $J = 8.4$  Hz, 1H), 7.50–7.24 (m, 10H), 7.02 (d,  $J = 8.0$  Hz, 2H), 6.53 (s, 1H), 2.27 (s, 3H); <sup>13</sup>C NMR:  $\delta$  144.4, 142.3, 138.2, 137.0, 134.8, 132.3, 131.0, 130.5, 129.4, 129.1, 127.4, 127.4, 126.8, 124.6, 124.2, 120.6, 116.6, 113.3, 21.5, 21.4; MS (EI)  $m/z$  361 ( $M^+$ , 88%), 206 (100%); HRMS (EI) Calcd for C<sub>22</sub>H<sub>19</sub>NO<sub>2</sub>S ( $M^+$ ) 361.1137. Found 361.1144

### **2-Butyl-1-tosylindole (2j)<sup>7</sup>**

<sup>1</sup>H NMR:  $\delta$  8.16 (d,  $J = 8.8$  Hz, 1H), 7.60 (d,  $J = 8.4$  Hz, 2H), 7.39 (d,  $J = 8.0$  Hz), 7.25–7.15 (m, 4H), 6.37 (s, 1H), 2.98 (t,  $J = 7.6$  Hz, 2H), 2.31 (s, 3H), 1.72 (m, 2H), 1.44 (m, 2H), 0.95 (t,  $J = 7.4$  Hz, 3H); <sup>13</sup>C NMR:  $\delta$  144.5, 142.5, 137.2, 136.3, 129.8, 129.7, 126.2, 123.7, 123.4, 120.0, 114.8, 108.6, 31.0, 28.7, 22.4, 21.5, 13.9; MS (EI)  $m/z$  327 ( $M^+$ , 80%), 130 (100%), 91 (43%); HRMS (EI) Calcd for C<sub>19</sub>H<sub>21</sub>NO<sub>2</sub>S ( $M^+$ ) 327.1293. Found 327.1298

### **3-Butyl-1-tosylindole<sup>8</sup>**

<sup>1</sup>H NMR:  $\delta$  7.97 (d,  $J = 8.4$  Hz, 1H), 7.73 (d,  $J = 8.8$  Hz, 2H), 7.47 (d,  $J = 8.0$  Hz), 7.30–7.18 (m, 5H), 2.64 (t,  $J = 7.6$  Hz, 2H), 2.33 (s, 3H), 1.66 (m, 2H), 1.38 (m, 2H), 0.94 (t,  $J = 7.6$  Hz, 3H); MS (EI)  $m/z$  327 ( $M^+$ , 100%), 130 (83%), 91 (63%); HRMS (EI) Calcd for C<sub>19</sub>H<sub>21</sub>NO<sub>2</sub>S ( $M^+$ ) 327.1293. Found 327.1298.

### **3-Butyl-2-phenyl-1-tosylindole (2k)**

m.p. 111–112 °C; <sup>1</sup>H NMR:  $\delta$  8.32 (d,  $J = 8.0$  Hz, 1H), 7.48–7.24 (m, 10H), 7.05 (d,  $J = 8.0$  Hz, 2H), 2.45 (t,  $J = 7.6$  Hz, 2H), 2.29 (s, 3H), 1.41 (m, 2H), 1.16 (m, 2H), 0.75 (t,  $J = 7.2$  Hz, 3H); <sup>13</sup>C NMR:  $\delta$  144.3, 137.4, 136.5, 135.2, 131.6, 131.3, 131.0, 129.1, 128.4, 127.4, 126.8, 124.7, 124.5, 123.7, 119.3, 116.2, 31.9, 23.9, 22.4, 21.5, 13.7; MS (EI)  $m/z$  403 ( $M^+$ , 100%), 248 (60%), 206 (73%); HRMS (EI) Calcd for C<sub>25</sub>H<sub>25</sub>NO<sub>2</sub>S ( $M^+$ ) 403.1606. Found 403.1602.

### 2-Butyl-3-phenyl-1-tosylindole

m.p. 100–101 °C;  $^1\text{H}$  NMR:  $\delta$  8.21 (d,  $J$  = 8.4 Hz, 1H), 7.62 (d,  $J$  = 8.8 Hz, 2H), 7.47–7.17 (m, 10H), 2.98 (t,  $J$  = 8.0 Hz), 2.33 (s, 3H), 1.71 (m, 2H), 1.28 (m,  $J$  = 8.0, 8.0 Hz, 2H), 0.82 (t,  $J$  = 8.0 Hz, 3H);  $^{13}\text{C}$  NMR:  $\delta$  144.5, 138.7, 136.7, 136.0, 133.3, 130.7, 130.0, 130.0, 129.7, 128.6, 127.4, 126.3, 124.3, 123.7, 119.3, 115.3, 33.4, 26.6, 22.5, 21.5, 13.7; MS (EI)  $m/z$  403 ( $\text{M}^+$ , 54%), 248 (15%), 206 (100%); HRMS (EI) Calcd for  $\text{C}_{25}\text{H}_{25}\text{NO}_2\text{S}$  ( $\text{M}^+$ ) 403.1606. Found 403.1597.

### 3-Methyl-2-phenyl-1-tosylindole (2l)

m.p. 163–164 °C;  $^1\text{H}$  NMR:  $\delta$  8.32 (d,  $J$  = 8.4 Hz, 1H), 7.44–7.30 (m, 10H), 7.04 (d,  $J$  = 8.0 Hz, 2H), 2.28 (s, 3H), 2.03 (s, 3H);  $^{13}\text{C}$  NMR:  $\delta$  144.3, 137.2, 136.6, 135.1, 131.7, 131.5, 131.3, 129.1, 128.3, 127.4, 126.8, 124.9, 123.9, 119.7, 119.0, 116.2, 21.5, 9.4; MS (EI)  $m/z$  361 ( $\text{M}^+$ , 52%), 206 (100%); HRMS (EI) Calcd for  $\text{C}_{22}\text{H}_{19}\text{NO}_2\text{S}$  ( $\text{M}^+$ ) 361.1137. Found 361.1146.

### 2-Methyl-3-phenyl-1-tosylindole<sup>9</sup>

$^1\text{H}$  NMR:  $\delta$  8.26 (d,  $J$  = 8.0 Hz, 1H), 7.72 (d,  $J$  = 8.4 Hz, 2H), 7.47–7.20 (m, 10H), 2.59 (s, 3H), 2.36 (s, 3H);  $^{13}\text{C}$  NMR:  $\delta$  144.7, 136.4, 136.3, 133.1, 133.1, 120.0, 130.0, 129.9, 128.5, 127.3, 126.4, 124.2, 123.5, 122.5, 119.2, 114.5, 21.6, 13.5; MS (EI)  $m/z$  361 ( $\text{M}^+$ , 41%), 206 (100%); HRMS (EI) Calcd for  $\text{C}_{22}\text{H}_{19}\text{NO}_2\text{S}$  ( $\text{M}^+$ ) 361.1137. Found 361.1144.

### 2,3-Dibutyl-1-tosylindole (2m)

$^1\text{H}$  NMR:  $\delta$  8.16 (dd,  $J$  = 7.6, 2.0 Hz, 1H), 7.50 (d,  $J$  = 8.2 Hz, 2H), 7.37 (dd,  $J$  = 8.0, 1.6 Hz, 1H), 7.25–7.18 (m, 2H), 7.10 (d,  $J$  = 8.2 Hz, 2H), 2.93 (t,  $J$  = 7.6 Hz, 2H), 2.56 (t,  $J$  = 7.6 Hz, 2H), 2.27 (s, 3H), 1.73 (q,  $J$  = 7.6 Hz, 2H), 1.55 (q,  $J$  = 7.6 Hz, 2H), 0.98 (t,  $J$  = 7.6 Hz, 3H), 0.85 (t,  $J$  = 7.6 Hz, 3H);  $^{13}\text{C}$  NMR:  $\delta$  144.2, 137.8, 137.0, 136.0, 131.1, 129.5, 126.1, 123.8, 123.3, 121.8, 118.5, 115.5, 33.1, 32.0, 26.3, 23.9, 22.7, 22.5, 21.4, 13.9, 13.8; MS (EI)  $m/z$  383 ( $\text{M}^+$ , 100%), 228 (30%), 91 (35%); HRMS (EI) Calcd for  $\text{C}_{23}\text{H}_{29}\text{NO}_2\text{S}$  ( $\text{M}^+$ ) 383.1919. Found 383.1926.

### 2-(4-Methoxyphenyl)-1-tosylindole (2n)<sup>7</sup>

$^1\text{H}$  NMR:  $\delta$  8.31 (d,  $J$  = 8.8 Hz, 1H), 7.43–7.35 (m, 3H), 7.32 (dd,  $J$  = 8.4, 1.5 Hz, 1H), 7.27–7.23 (m, 3H), 7.03 (d,  $J$  = 8.0 Hz, 2H), 6.95 (d,  $J$  = 8.8 Hz, 2H), 6.48 (s, 1H), 3.89 (s, 3H), 2.28 (s, 3H);  $^{13}\text{C}$  NMR:  $\delta$  160.0, 144.4, 142.0, 138.2, 134.7, 131.6, 130.6, 129.1, 126.8, 124.7, 124.5, 124.2, 120.5, 116.7, 113.0, 112.9, 55.3, 21.5; MS (EI)  $m/z$  377 ( $\text{M}^+$ , 39%), 222 (100%); HRMS (EI) Calcd for  $\text{C}_{22}\text{H}_{19}\text{NO}_3\text{S}$  ( $\text{M}^+$ ) 377.1086. Found 377.1096.

**2-(3-Methylphenyl)-1-tosylindole (2o)**

m.p. 104–105 °C; <sup>1</sup>H NMR: δ 8.30 (d, *J* = 8.8 Hz, 1H), 7.43 (d, *J* = 7.6 Hz, 1H), 7.36–7.23 (m, 8H), 7.04 (d, *J* = 8.0 Hz, 2H), 6.52 (s, 1H), 2.41 (s, 3H), 2.29 (s, 3H); <sup>13</sup>C NMR: δ 144.4, 142.3, 138.2, 137.0, 134.8, 132.3, 131.0, 130.5, 129.4, 129.1, 127.4, 127.4, 126.8, 124.6, 124.2, 120.6, 116.6, 113.3, 21.5, 21.4; MS (EI) *m/z* 361 (M<sup>+</sup>, 88%), 206 (100%); HRMS (EI) Calcd for C<sub>22</sub>H<sub>19</sub>NO<sub>2</sub>S (M<sup>+</sup>) 361.1137. Found 361.1144.

**2-(4-Methylphenyl)-1-tosylindole (2p)<sup>10</sup>**

<sup>1</sup>H NMR: δ 8.30 (d, *J* = 8.4 Hz, 1H), 7.42–7.38 (m, 3H), 7.35–7.21 (m, 7.03, 6H), 7.01 (d, *J* = 8.0 Hz, 2H), 6.49 (s, 1H), 2.43 (s, 3H), 2.26 (s, 3H); <sup>13</sup>C NMR: δ 144.4, 142.3, 138.6, 138.2, 134.7, 130.6, 130.2, 129.5, 129.1, 128.2, 126.8, 124.6, 124.2, 120.5, 116.6, 113.2, 21.5, 21.4; MS (EI) *m/z* 361 (M<sup>+</sup>, 60%), 206 (100%); HRMS (EI) Calcd for C<sub>22</sub>H<sub>19</sub>NO<sub>2</sub>S (M<sup>+</sup>) 361.1137. Found 361.1130.

**2-(1-Naphthyl)-1-tosylindole (2q)<sup>10</sup>**

<sup>1</sup>H NMR: δ 8.39 (d, *J* = 8.8 Hz, 1H), 7.93 (d, *J* = 8.4 Hz, 1H), 7.86 (d, *J* = 7.6 Hz, 1H), 7.63 (d, *J* = 8.4 Hz, 1H), 7.54–7.39 (m, 5H), 7.33–7.29 (m, 2H), 7.24 (d, *J* = 8.8 Hz, 2H), 6.93 (d, *J* = 8.8 Hz, 2H), 6.64 (s, 1H), 2.23 (s, 3H); <sup>13</sup>C NMR: δ 144.5, 138.8, 137.6, 135.3, 133.4, 133.0, 130.0, 129.8, 129.5, 129.3, 129.2, 128.0, 126.9, 126.2, 126.1, 125.7, 124.8, 124.4, 123.9, 120.8, 115.8, 113.7, 21.4; MS (EI) *m/z* 397 (M<sup>+</sup>, 41%), 242 (100%), 91 (44%); HRMS (EI) Calcd for C<sub>25</sub>H<sub>19</sub>NO<sub>2</sub>S (M<sup>+</sup>) 397.1137. Found 397.1129.

**2-(6-Methoxynaphth-2-yl)-1-tosylindole (2r)**

m.p. 193–194 °C; <sup>1</sup>H NMR: δ 8.33 (d, *J* = 7.6 Hz, 1H), 7.79–7.75 (m, 3H), 6.65 (dd, *J* = 8.6, 1.8 Hz, 1H), 7.45 (d, *J* = 7.6 Hz, 1H), 7.36 (td, *J* = 8.4, 1.2 Hz, 1H), 7.29–7.24 (m, 3H), 7.21–7.18 (m, 2H), 7.00 (d, *J* = 7.6 Hz, 2H), 6.60 (s, 1H), 3.96 (s, 3H), 2.27 (s, 3H); <sup>13</sup>C NMR: δ 158.3, 144.5, 142.3, 138.3, 134.7, 134.5, 130.7, 129.7, 129.1, 129.1, 128.7, 128.1, 127.8, 126.8, 125.6, 124.7, 124.3, 120.6, 119.1, 116.7, 113.7, 105.8, 55.4, 21.5; MS (EI) *m/z* 427 (M<sup>+</sup>, 52%), 272 (100%); HRMS (EI) Calcd for C<sub>26</sub>H<sub>21</sub>NO<sub>3</sub>S (M<sup>+</sup>) 427.1242. Found 427.1249.

**2-(1-Cyclohexene-1-yl)-1-tosylindole (2s)<sup>11</sup>**

<sup>1</sup>H NMR: δ 8.17 (d, *J* = 8.0 Hz, 1H), 7.51 (d, *J* = 8.4 Hz), 7.37 (d, *J* = 7.8 Hz, 1H), 7.26 (dd, *J* = 7.8, 7.8 Hz, 1H), 7.19 (dd, *J* = 8.0, 8.0 Hz, 1H), 7.09 (d, *J* = 8.4 Hz, 2H), 6.34 (s, 1H), 5.74 (s, 1H), 2.44 (m, 2H), 2.23 (m, 2H), 1.81 (t, *J* = 5.6 Hz, 2H), 1.72 (t, *J* = 5.6 Hz, 2H); <sup>13</sup>C NMR: δ 144.9, 144.3, 137.7, 135.1, 132.4, 130.7, 129.4, 129.1, 126.7, 124.2, 123.9, 120.4, 116.0, 110.9,

30.5, 25.6, 22.7, 21.9, 21.5; MS (EI) m/z 351 ( $M^+$ , 100%), 287 (33%), 196 (59%); HRMS (EI) Calcd for  $C_{21}H_{21}NO_2S$  ( $M^+$ ) 351.1298. Found 351.1293.

#### Methyl 2,3-dipentyl-1-tosylindole-5-carboxylate (2t)

$^1H$  NMR:  $\delta$  8.20 (d,  $J = 8.8$  Hz, 1H), 8.09 (d,  $J = 1.4$  Hz, 1H), 7.93 (dd,  $J = 8.8$  Hz, 1.4 Hz, 1H), 7.52 (d,  $J = 8.0$  Hz, 2H), 7.14 (d,  $J = 8.0$  Hz, 2H), 3.92 (s, 3H), 2.94 (t,  $J = 7.8$  Hz, 2H), 2.61 (t,  $J = 7.8$  Hz, 2H), 2.30 (s, 3H), 1.69 (brd, 2H), 1.53 (td,  $J = 7.8, 7.8$  Hz, 2H), 1.37–1.26 (m, 8H), 0.92–0.83 (m, 6H);  $^{13}C$  NMR:  $\delta$  167.4, 144.6, 139.6, 139.2, 135.8, 130.9, 129.6, 126.1, 125.3, 125.1, 121.9, 120.6, 115.0, 52.0, 31.9, 31.6, 30.6, 29.6, 29.6, 26.6, 24.1, 22.4, 22.4, 21.5, 14.0, 14.0; MS (EI) m/z 469 ( $M^+$ , 100%), 314 (37%); HRMS (EI) Calcd for  $C_{27}H_{35}NO_4S$  ( $M^+$ ) 469.2280. Found 469.2287.

#### 2,3-Diphenylindole (3)<sup>6</sup>

$^1H$  NMR:  $\delta$  8.13 (s, 1H), 7.67 (d,  $J = 8.0$  Hz, 1H), 7.44–7.18 (m, 13H);  $^{13}C$  NMR:  $\delta$  135.8, 135.0, 134.0, 132.6, 130.1, 128.7, 128.6, 128.5, 128.2, 127.6, 126.2, 122.7, 122.6, 119.7, 115.0, 110.9; MS (EI) m/z 269 ( $M^+$ , 100%), 84 (33%); HRMS (EI) Calcd for  $C_{20}H_{15}N$  ( $M^+$ ) 269.1205. Found 269.1199.

#### References

- 1 K. Hiroya, S. Itoh and T. Sakamoto, *J. Org. Chem.* **2004**, *69*, 1126–1136.
- 2 C. C. Kofink, B. Benoit, S. Pagano, N. Goetz and P. Knochel, *Chem. Commun.* **2007**, 1954–1956.
- 3 T. G. Back, R. J. Bethell, M. Parvez and J. A. Taylor, *J. Org. Chem.* **2001**, *66*, 8599–8605.
- 4 R. D. Clark, J. M. Muchowski, L. E. Fisher, L. A. Flippin and D. B. Repke, M., Souchet, *Synthesis* **1991**, 871–878.
- 5 D. R. Stuart, M. Bertrand-Laperle, K. M. N. Burgess and K. Fagnou, *J. Am. Chem. Soc.* **2008**, *130*, 16474–16475.
- 6 R. C. Larock, E. K. Yum and M. D. Refvik, *J. Org. Chem.* **1998**, *63*, 7652–7662.
- 7 T. Kurisaki, T. Naniwa, H. Yamamoto, H. Imagawa and M. Nishizawa, *Tetrahedron Lett.* **2007**, *48*, 1871–1874.
- 8 T. Miyagi, Y. Hari and T. Aoyama, *Tetrahedron. Lett.* **2004**, *45*, 6303–6305.
- 9 A. Fürstner, A. Hupperts, A. Ptock and E. Janssen, *J. Org. Chem.* **1994**, *59*, 5215–5229.
- 10 S. S. Palimkar, P. H. Kumar, R. J. Lahoti and K. V. Srinivasan, *Tetrahedron* **2006**, *62*, 5109–5115.
- 11 K. B. Hong, C. W. Chul and E. K. Yun, *Tetrahedron Lett.* **2004**, *45*, 693–697.

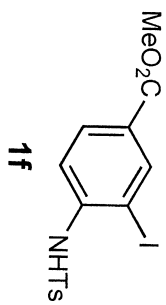

- 8.320
- 8.315
- 7.938
- 7.935
- 7.918
- 7.913
- 7.710
- 7.690
- 7.660
- 7.640
- 7.293
- 7.245
- 7.225
- 7.173

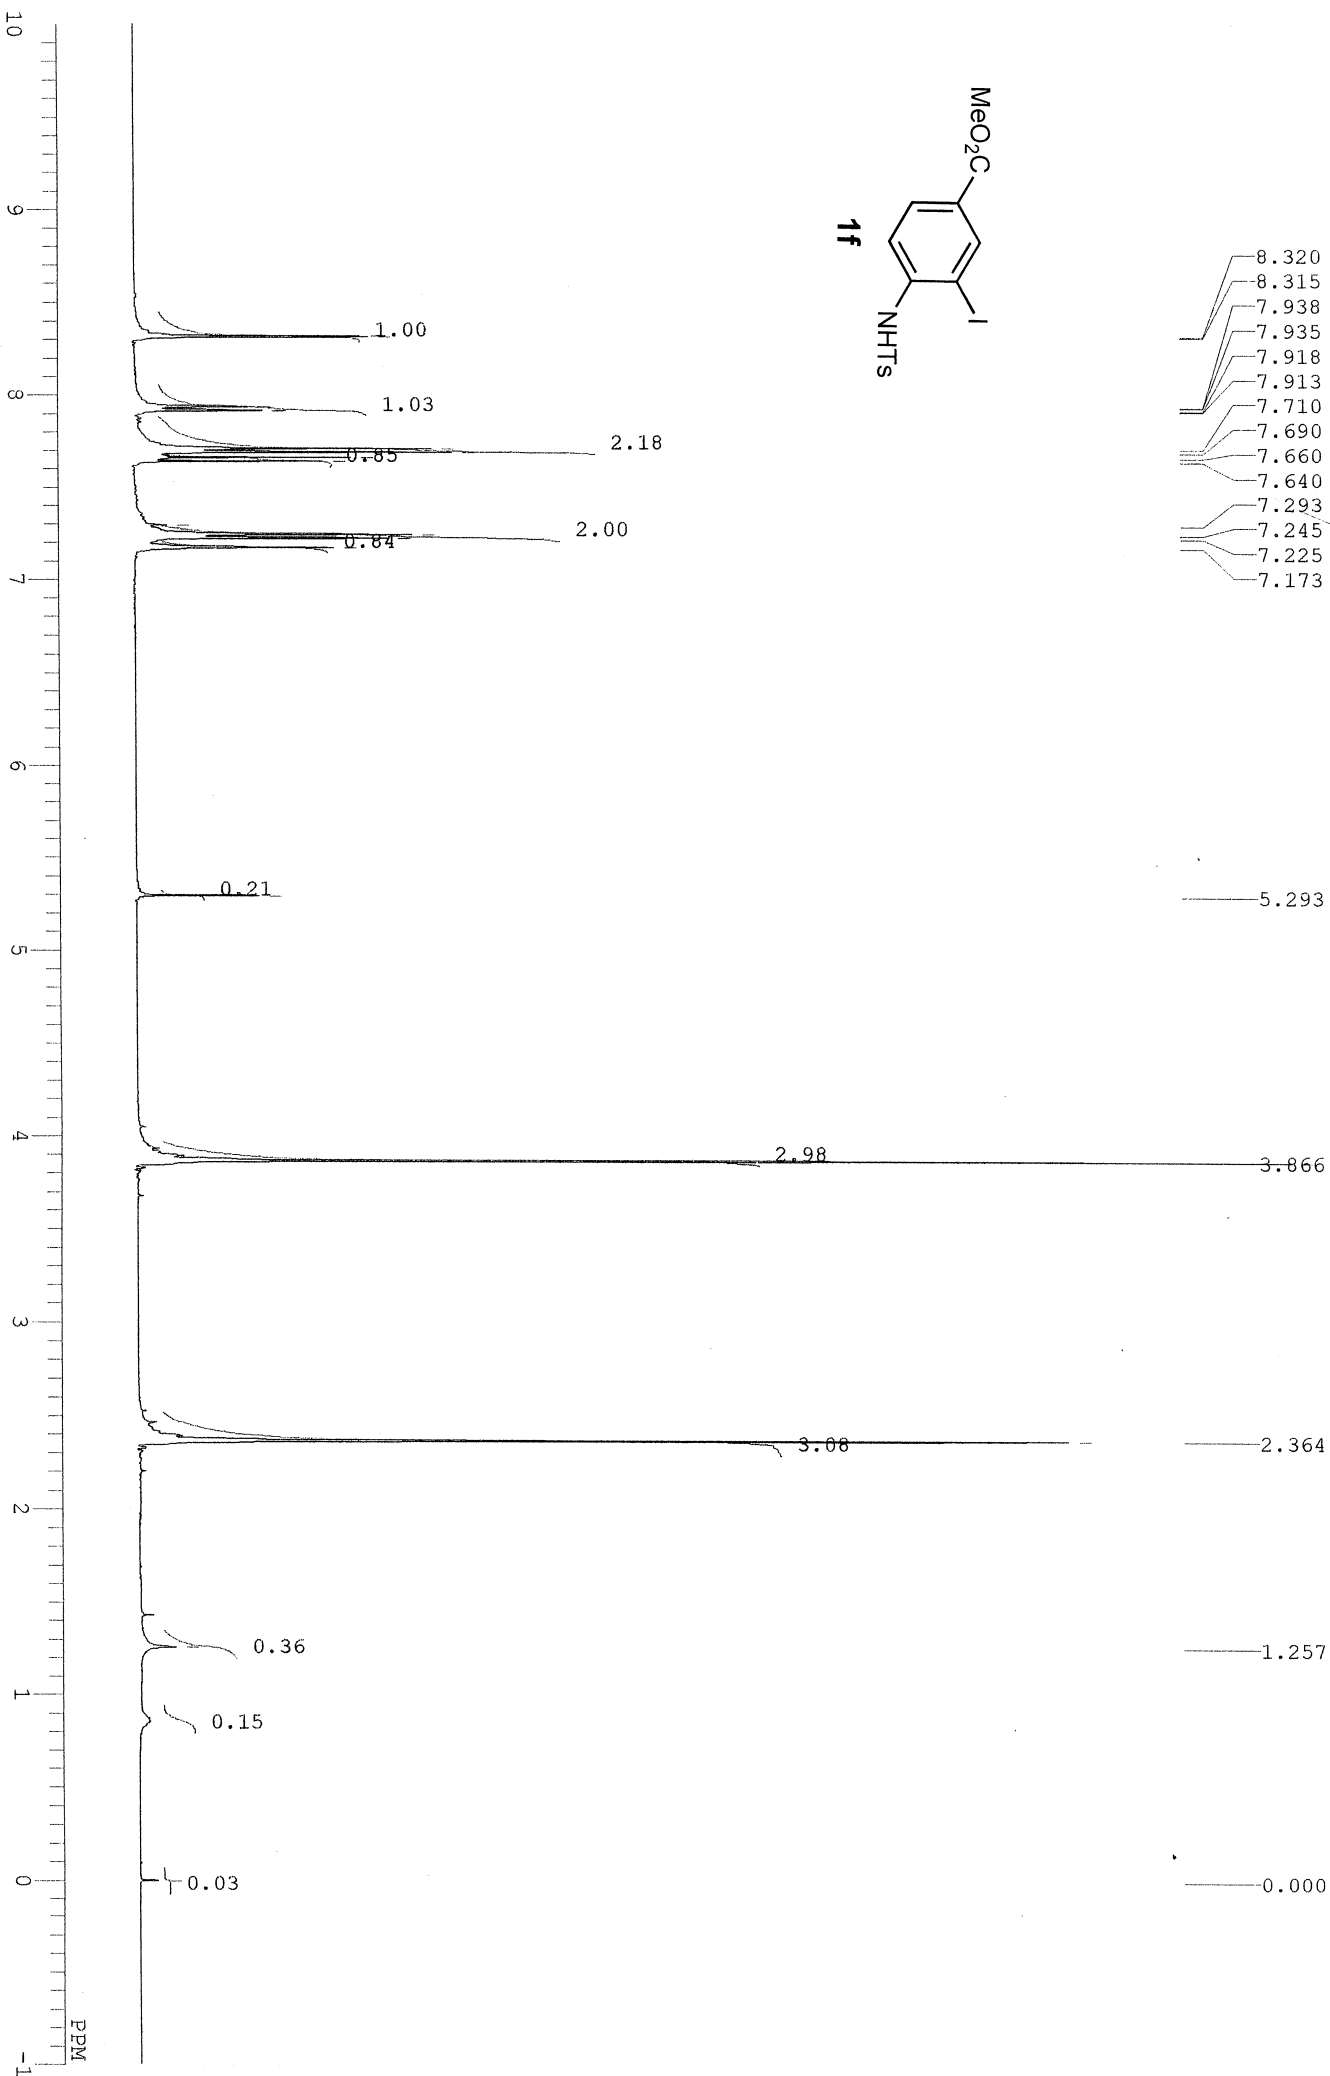



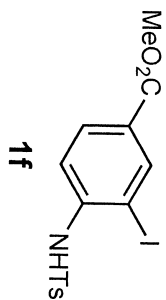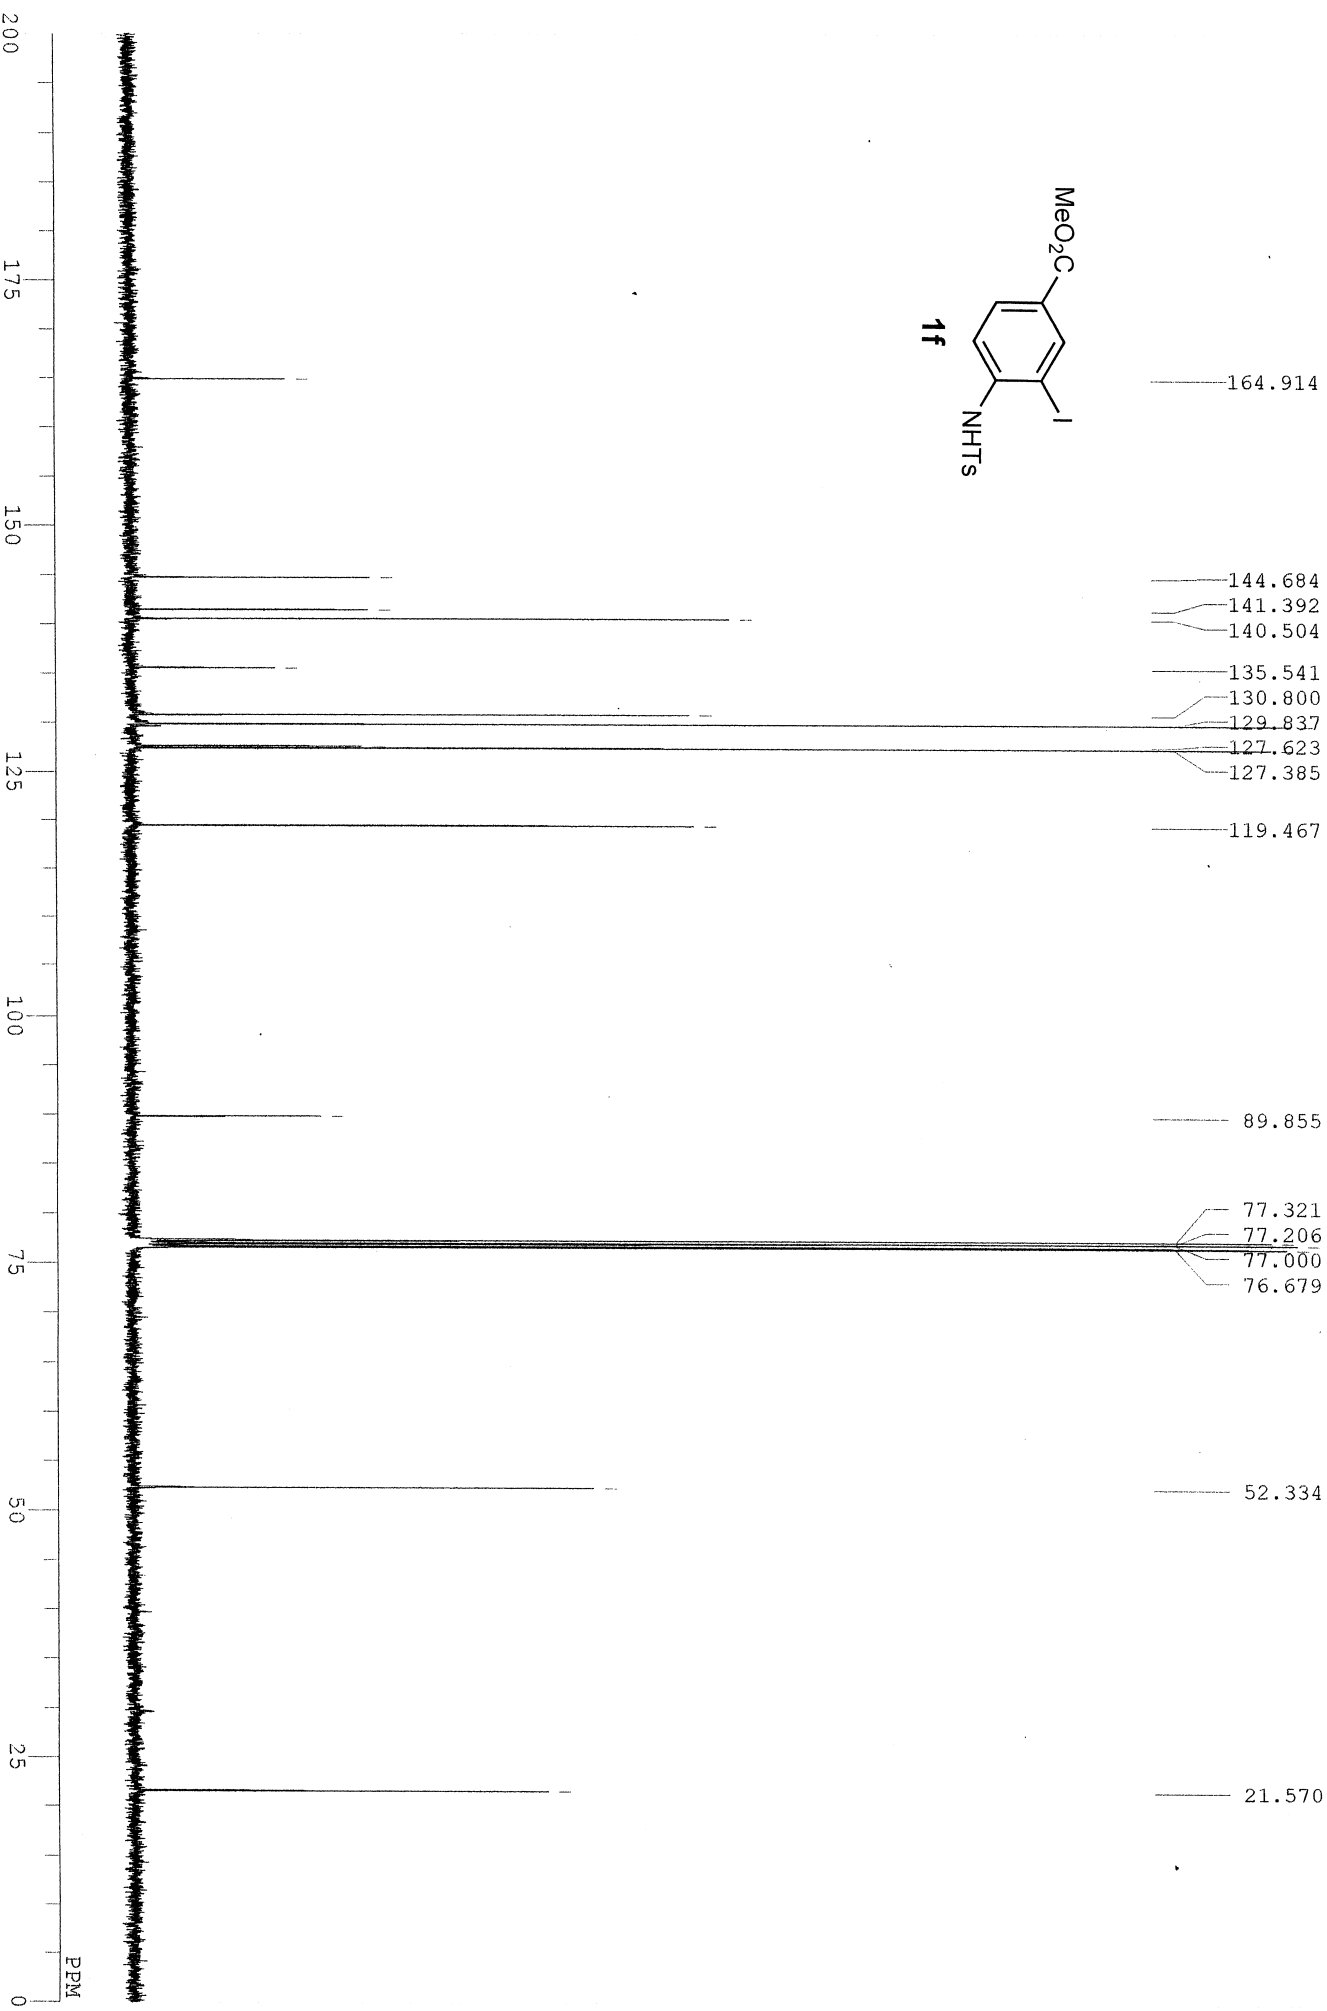

DFILE C:\  
 COMNT azu  
 DATIM Tue  
 OBNTC 13C  
 EXMOD BCM  
 OBFRQ  
 OBSEF  
 OBFIN  
 POINT  
 FREQU  
 SCANS  
 ACOFM  
 PD  
 PWT  
 IRNUC 1H  
 CTEMP  
 SIVNT  
 EXREF  
 BF  
 RGA IN

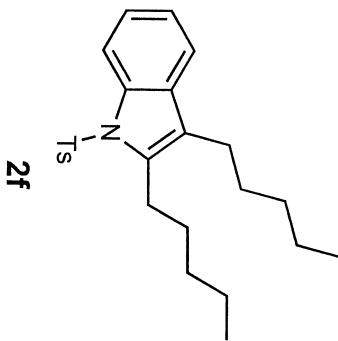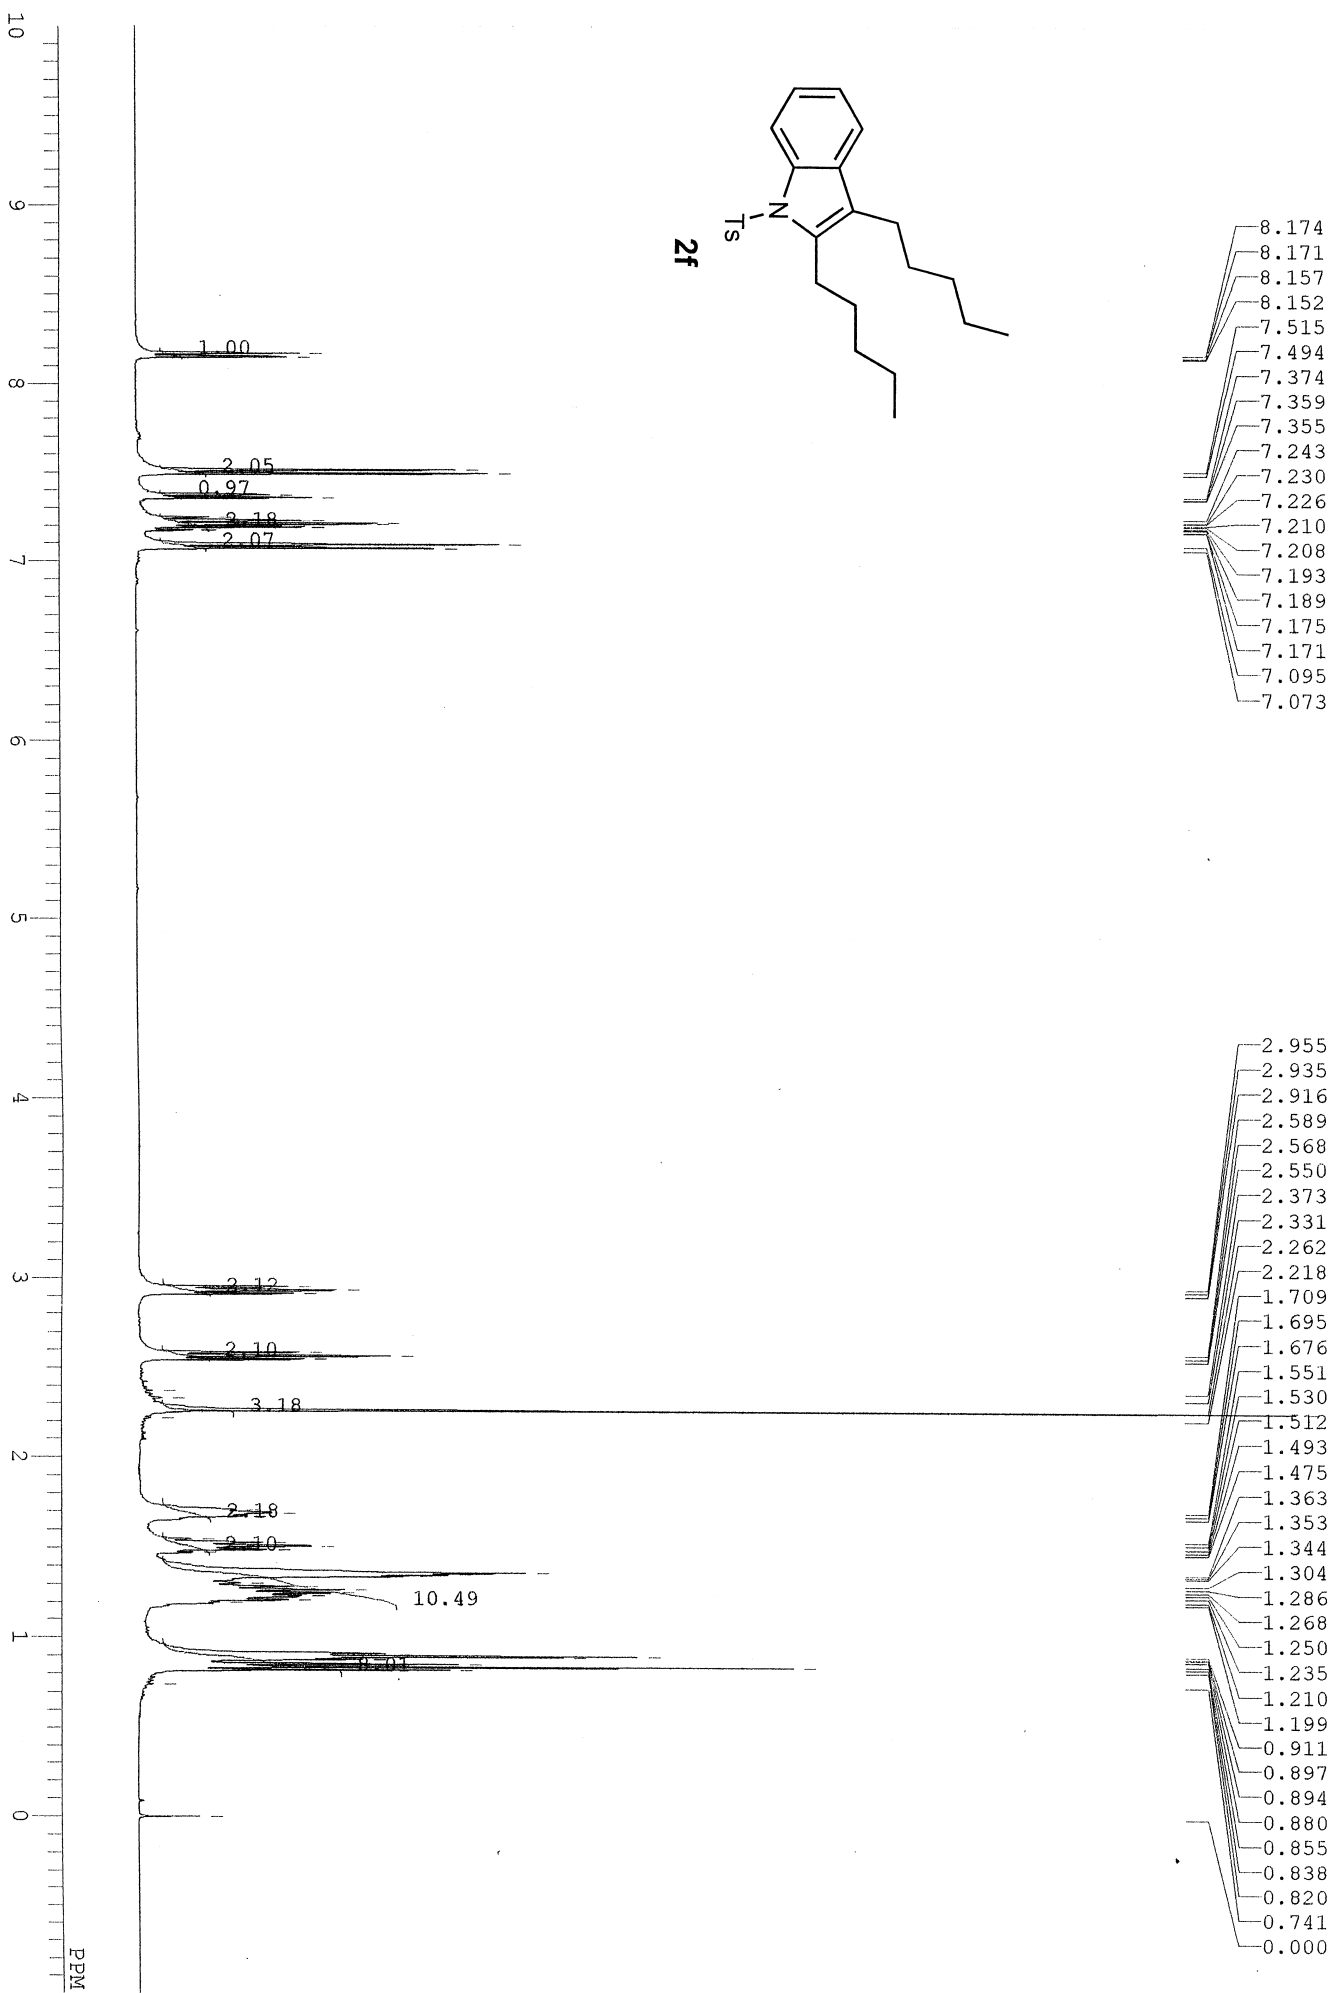

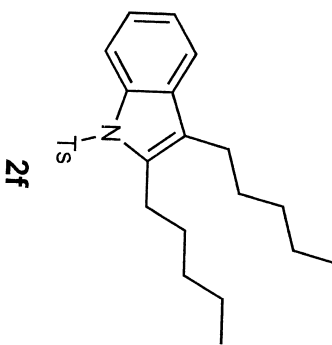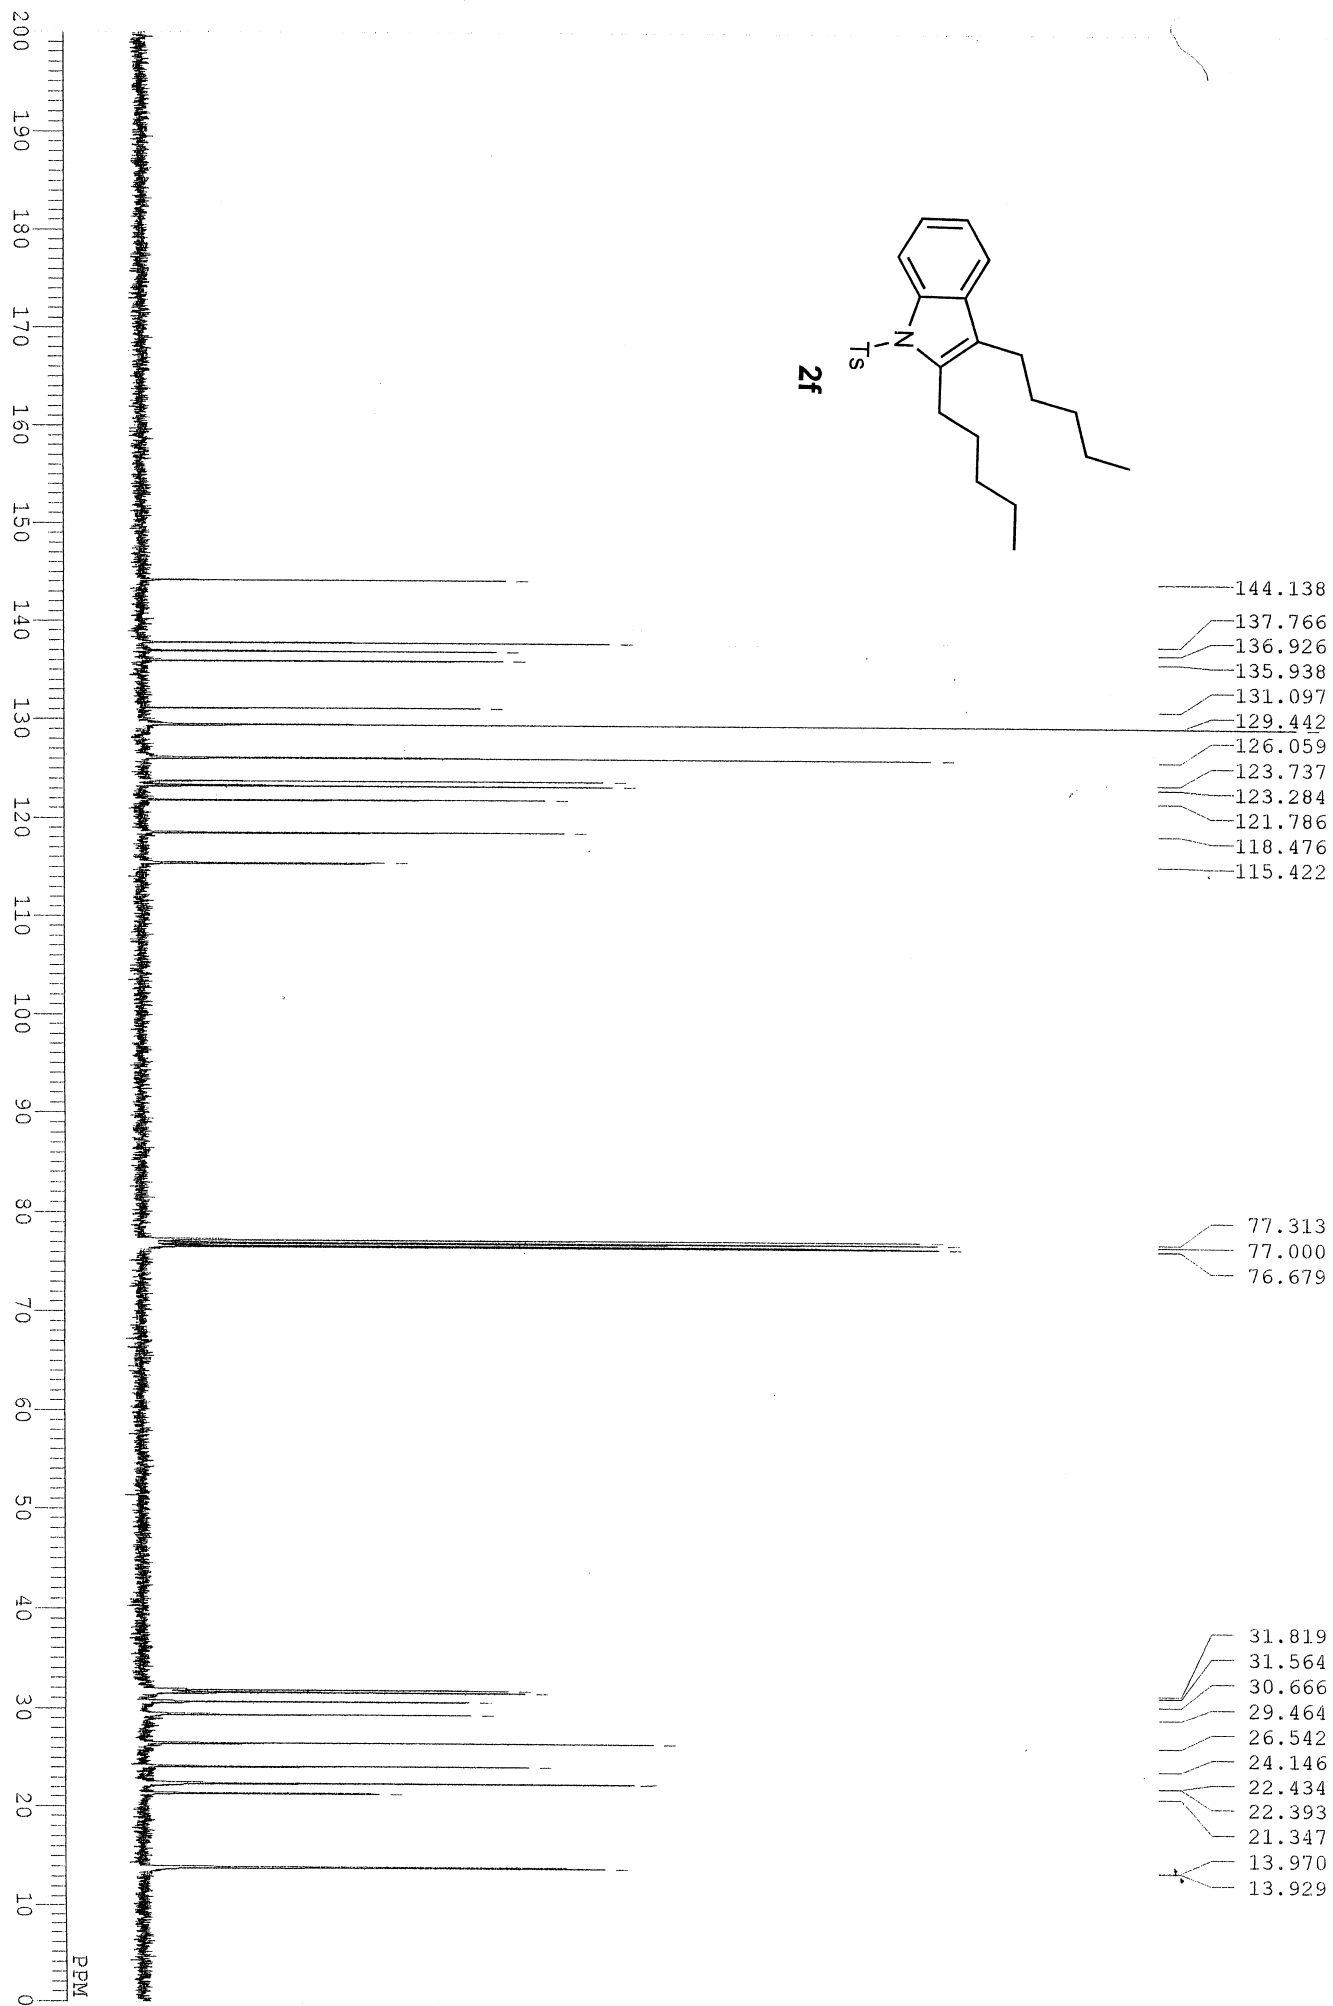

- 8.178
- 8.174
- 8.156
- 7.560
- 7.539
- 7.410
- 7.393
- 7.388
- 7.265
- 7.254
- 7.247
- 7.232
- 7.227
- 7.214
- 7.195
- 7.143
- 7.122

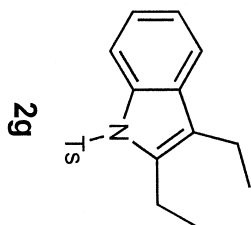

- 3.021
- 3.002
- 2.984
- 2.966
- 2.641
- 2.623
- 2.603
- 2.584
- 2.303

- 1.559
- 1.314
- 1.294
- 1.276
- 1.257
- 1.171
- 1.152
- 1.132

0.000

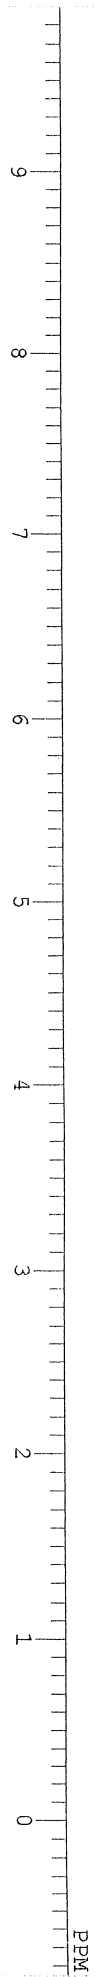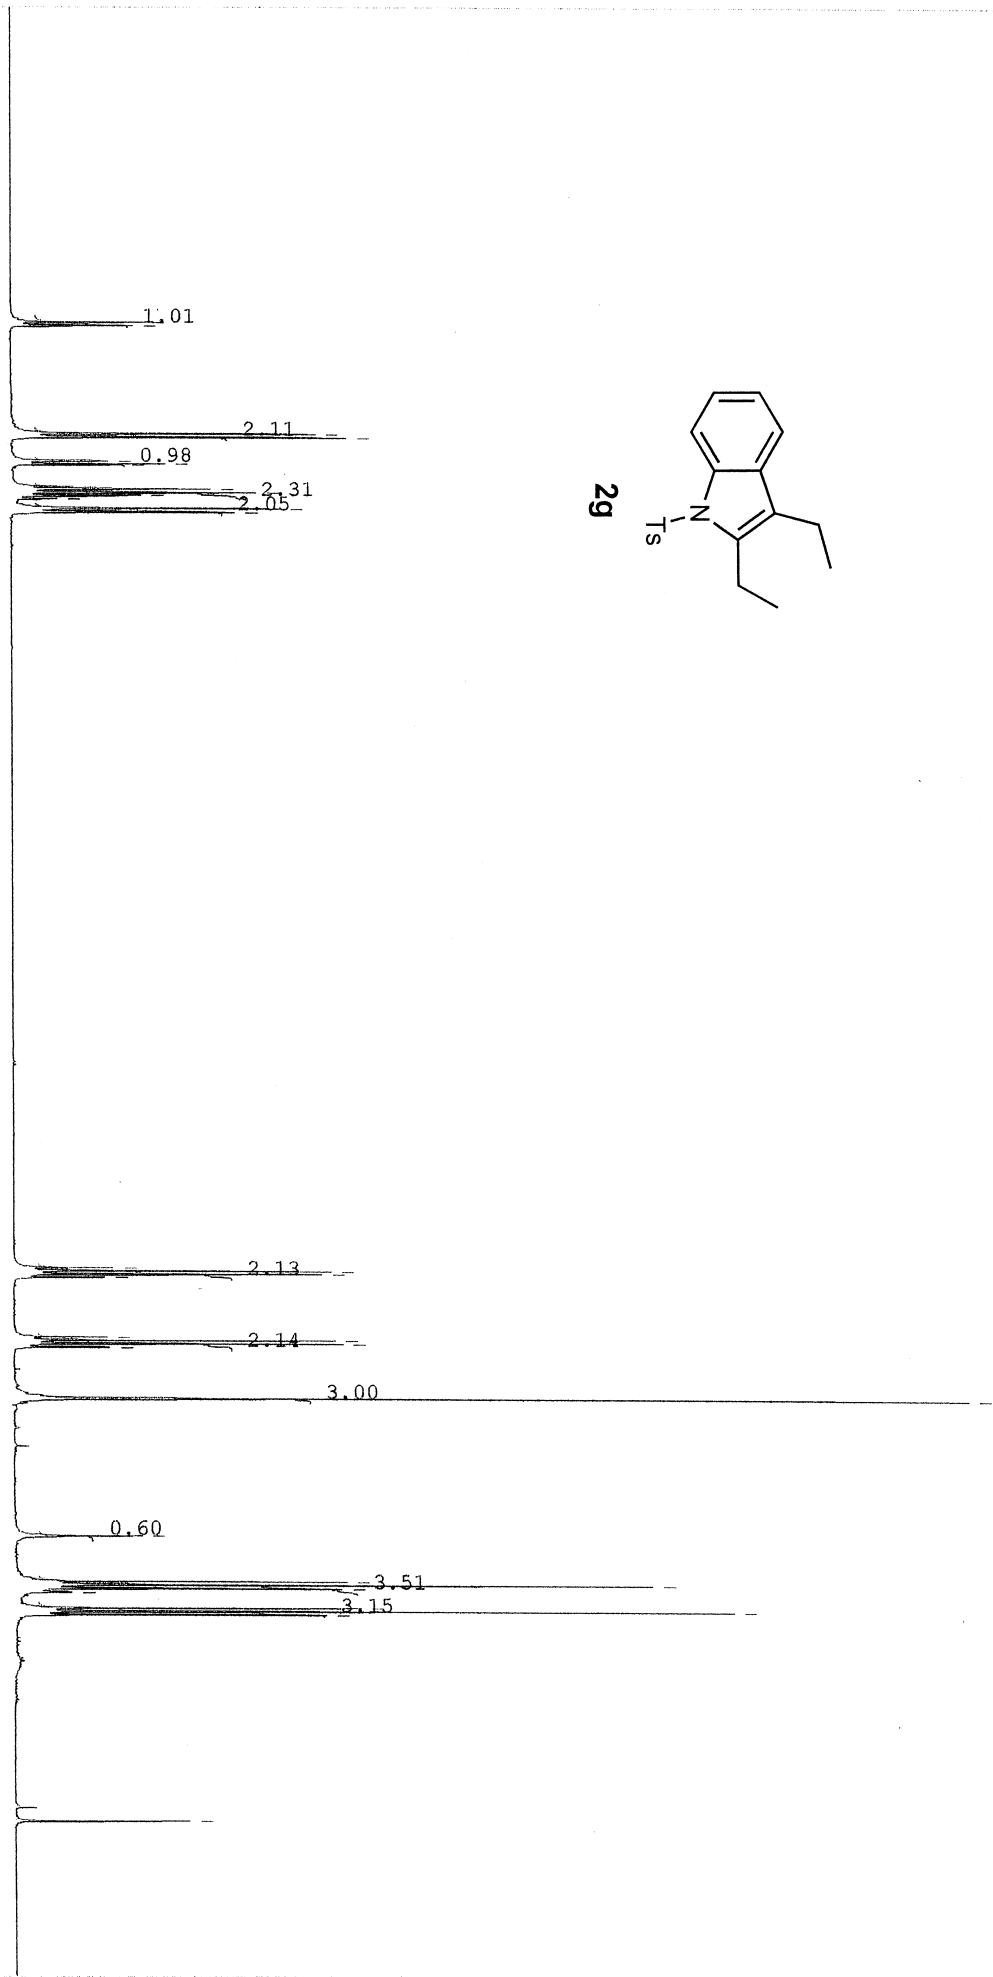

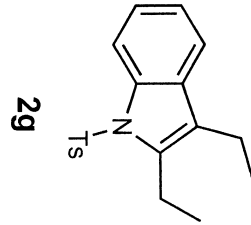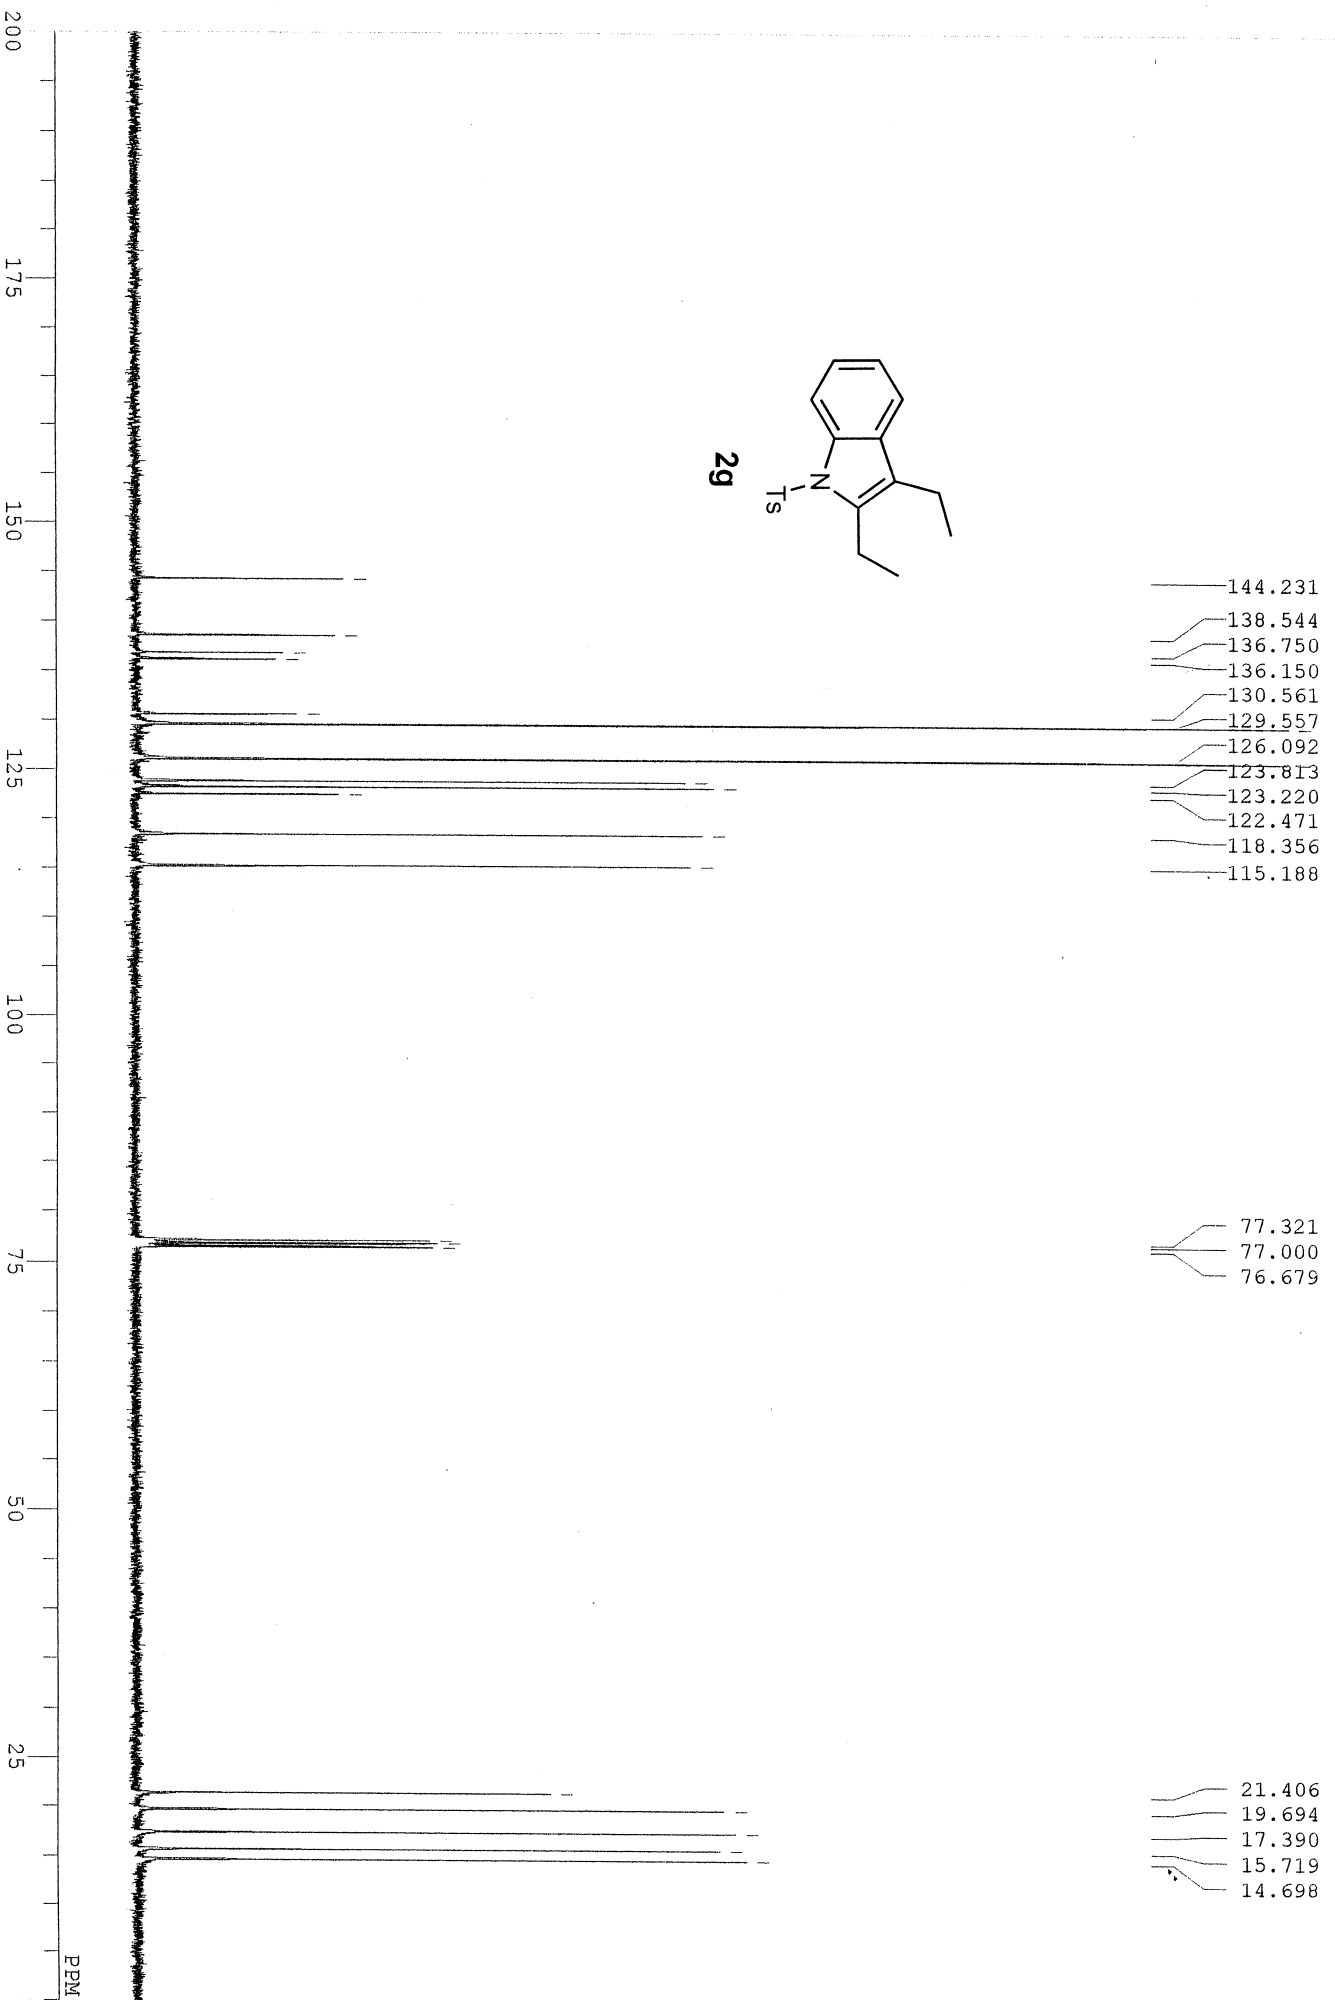

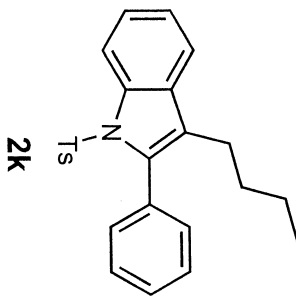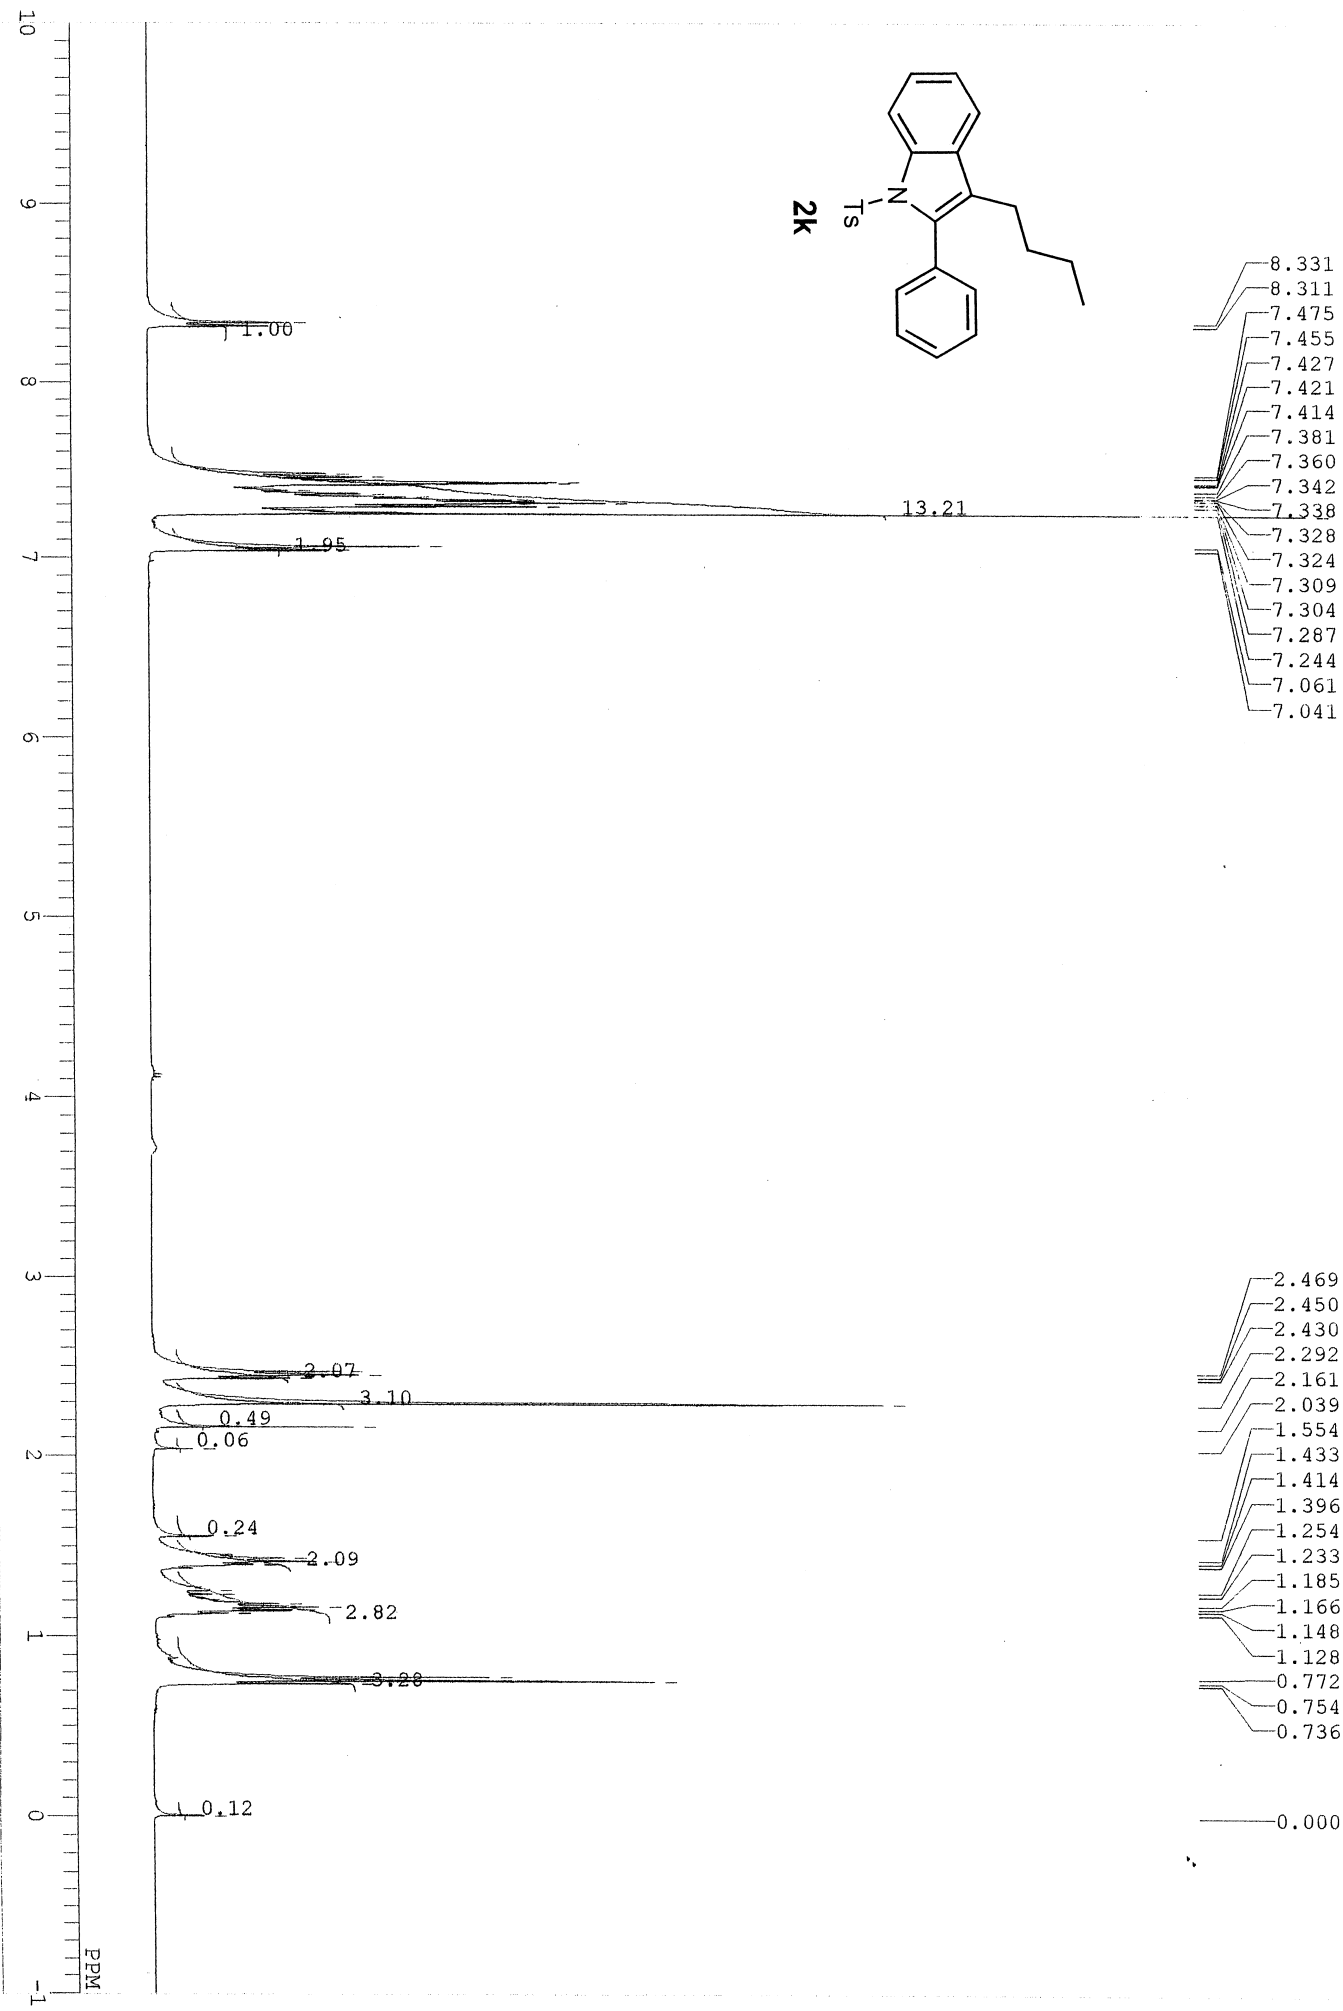

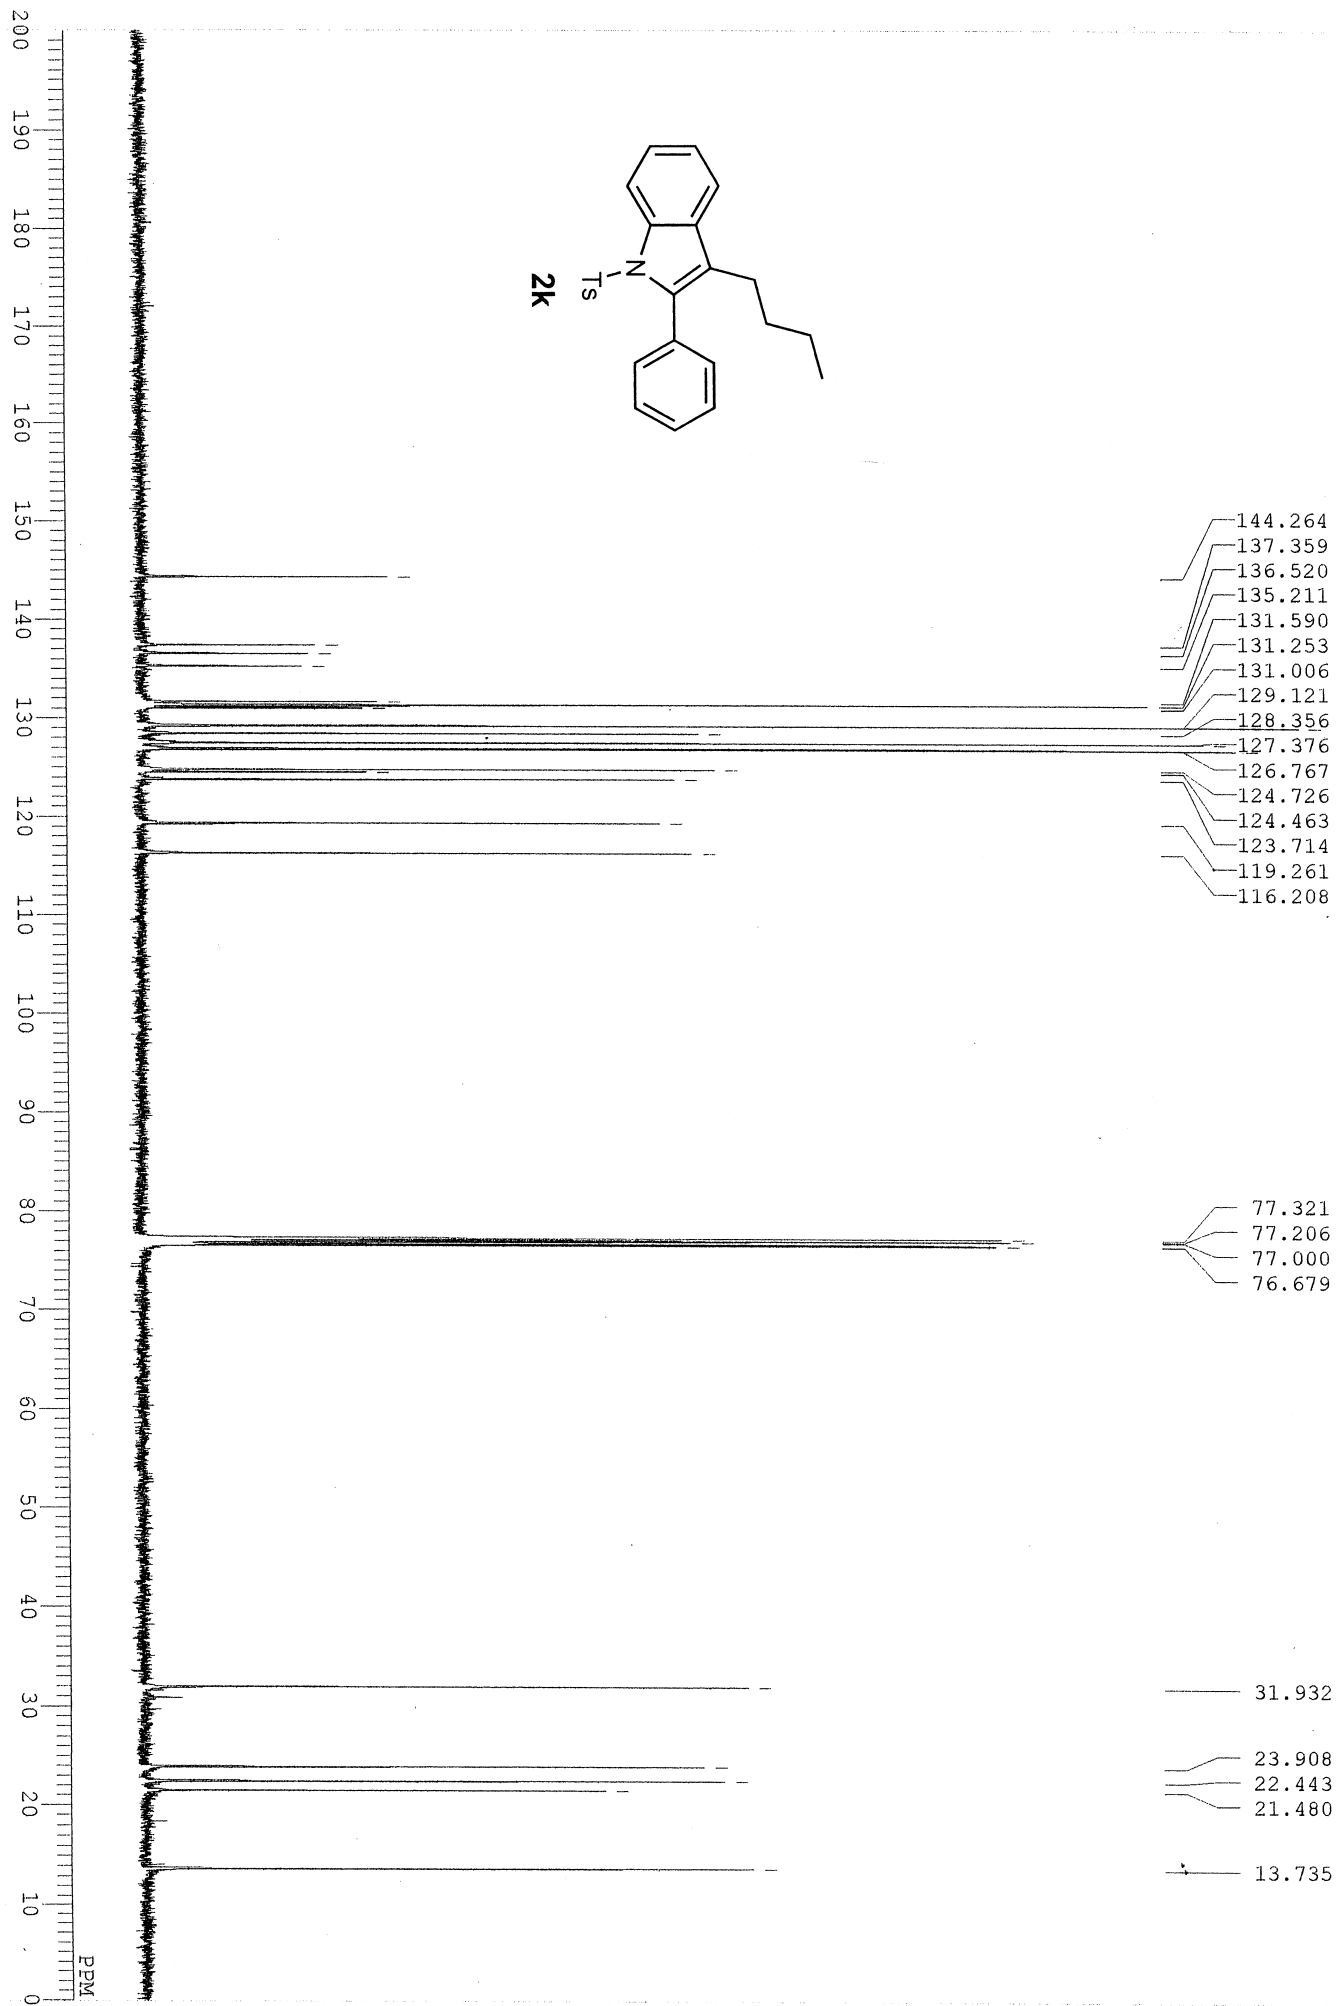

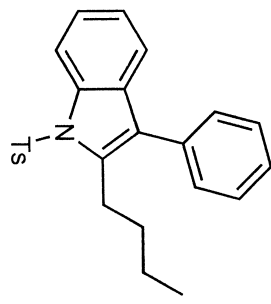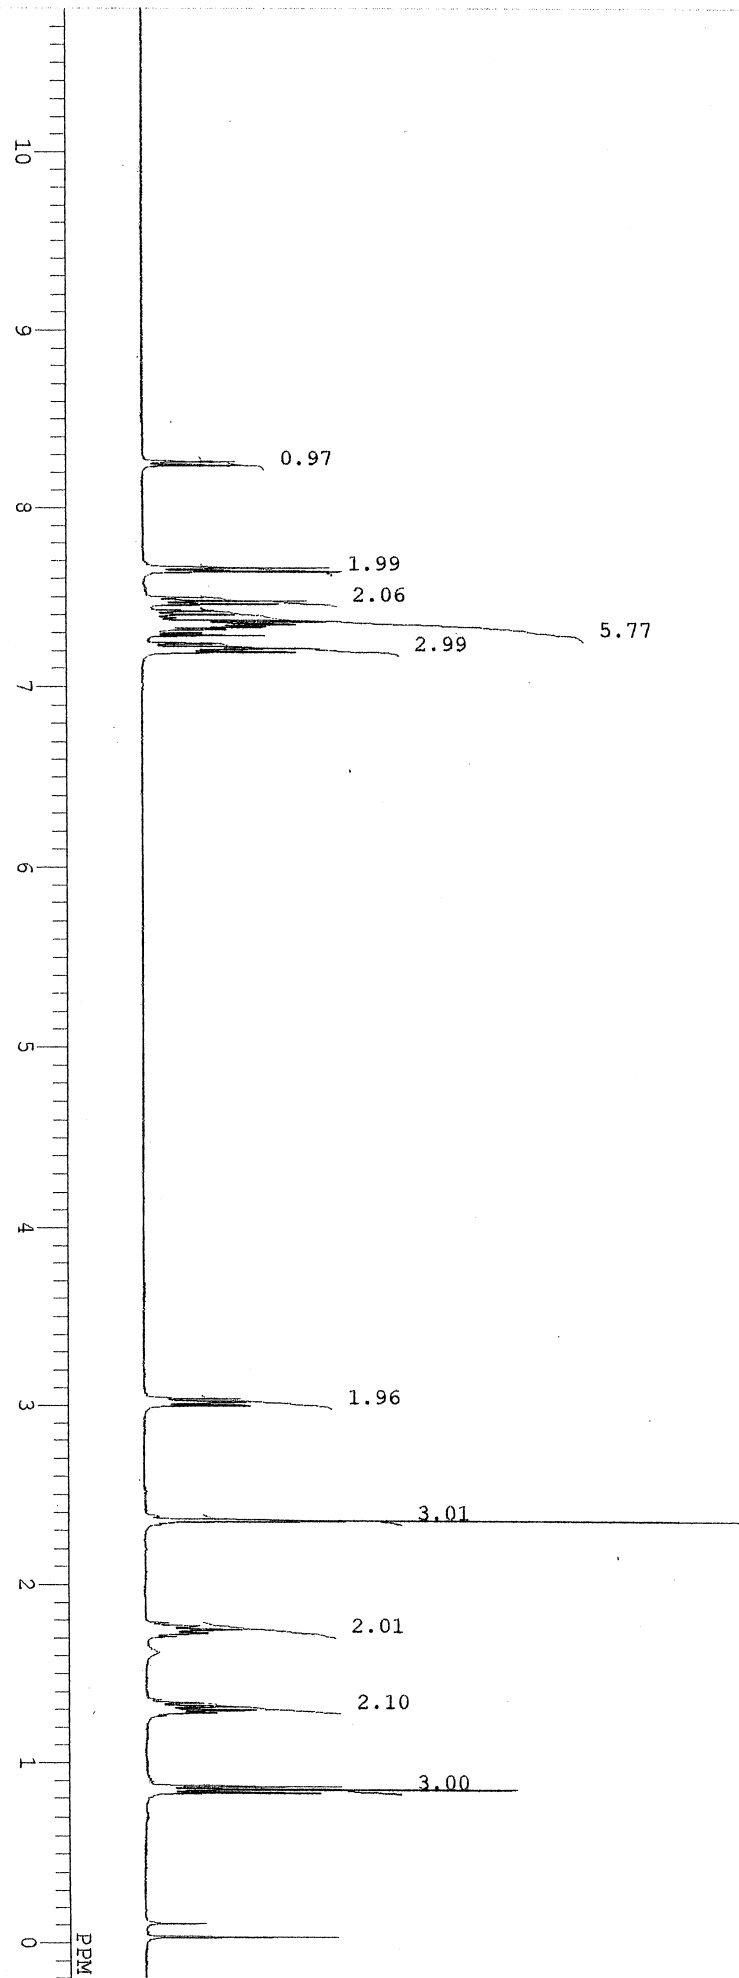



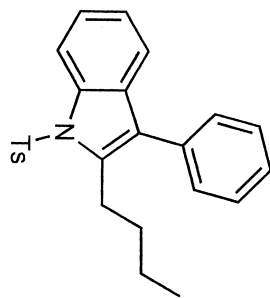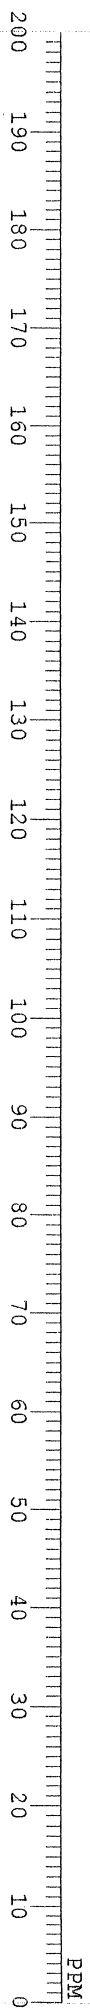

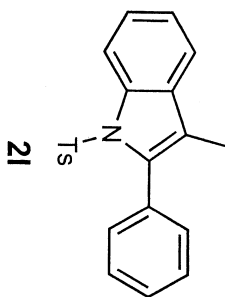

- 8.330
- 8.309
- 7.441
- 7.432
- 7.425
- 7.421
- 7.414
- 7.397
- 7.393
- 7.378
- 7.376
- 7.372
- 7.358
- 7.354
- 7.345
- 7.343
- 7.341
- 7.337
- 7.330
- 7.319
- 7.316
- 7.300
- 7.280
- 7.254
- 7.055
- 7.034

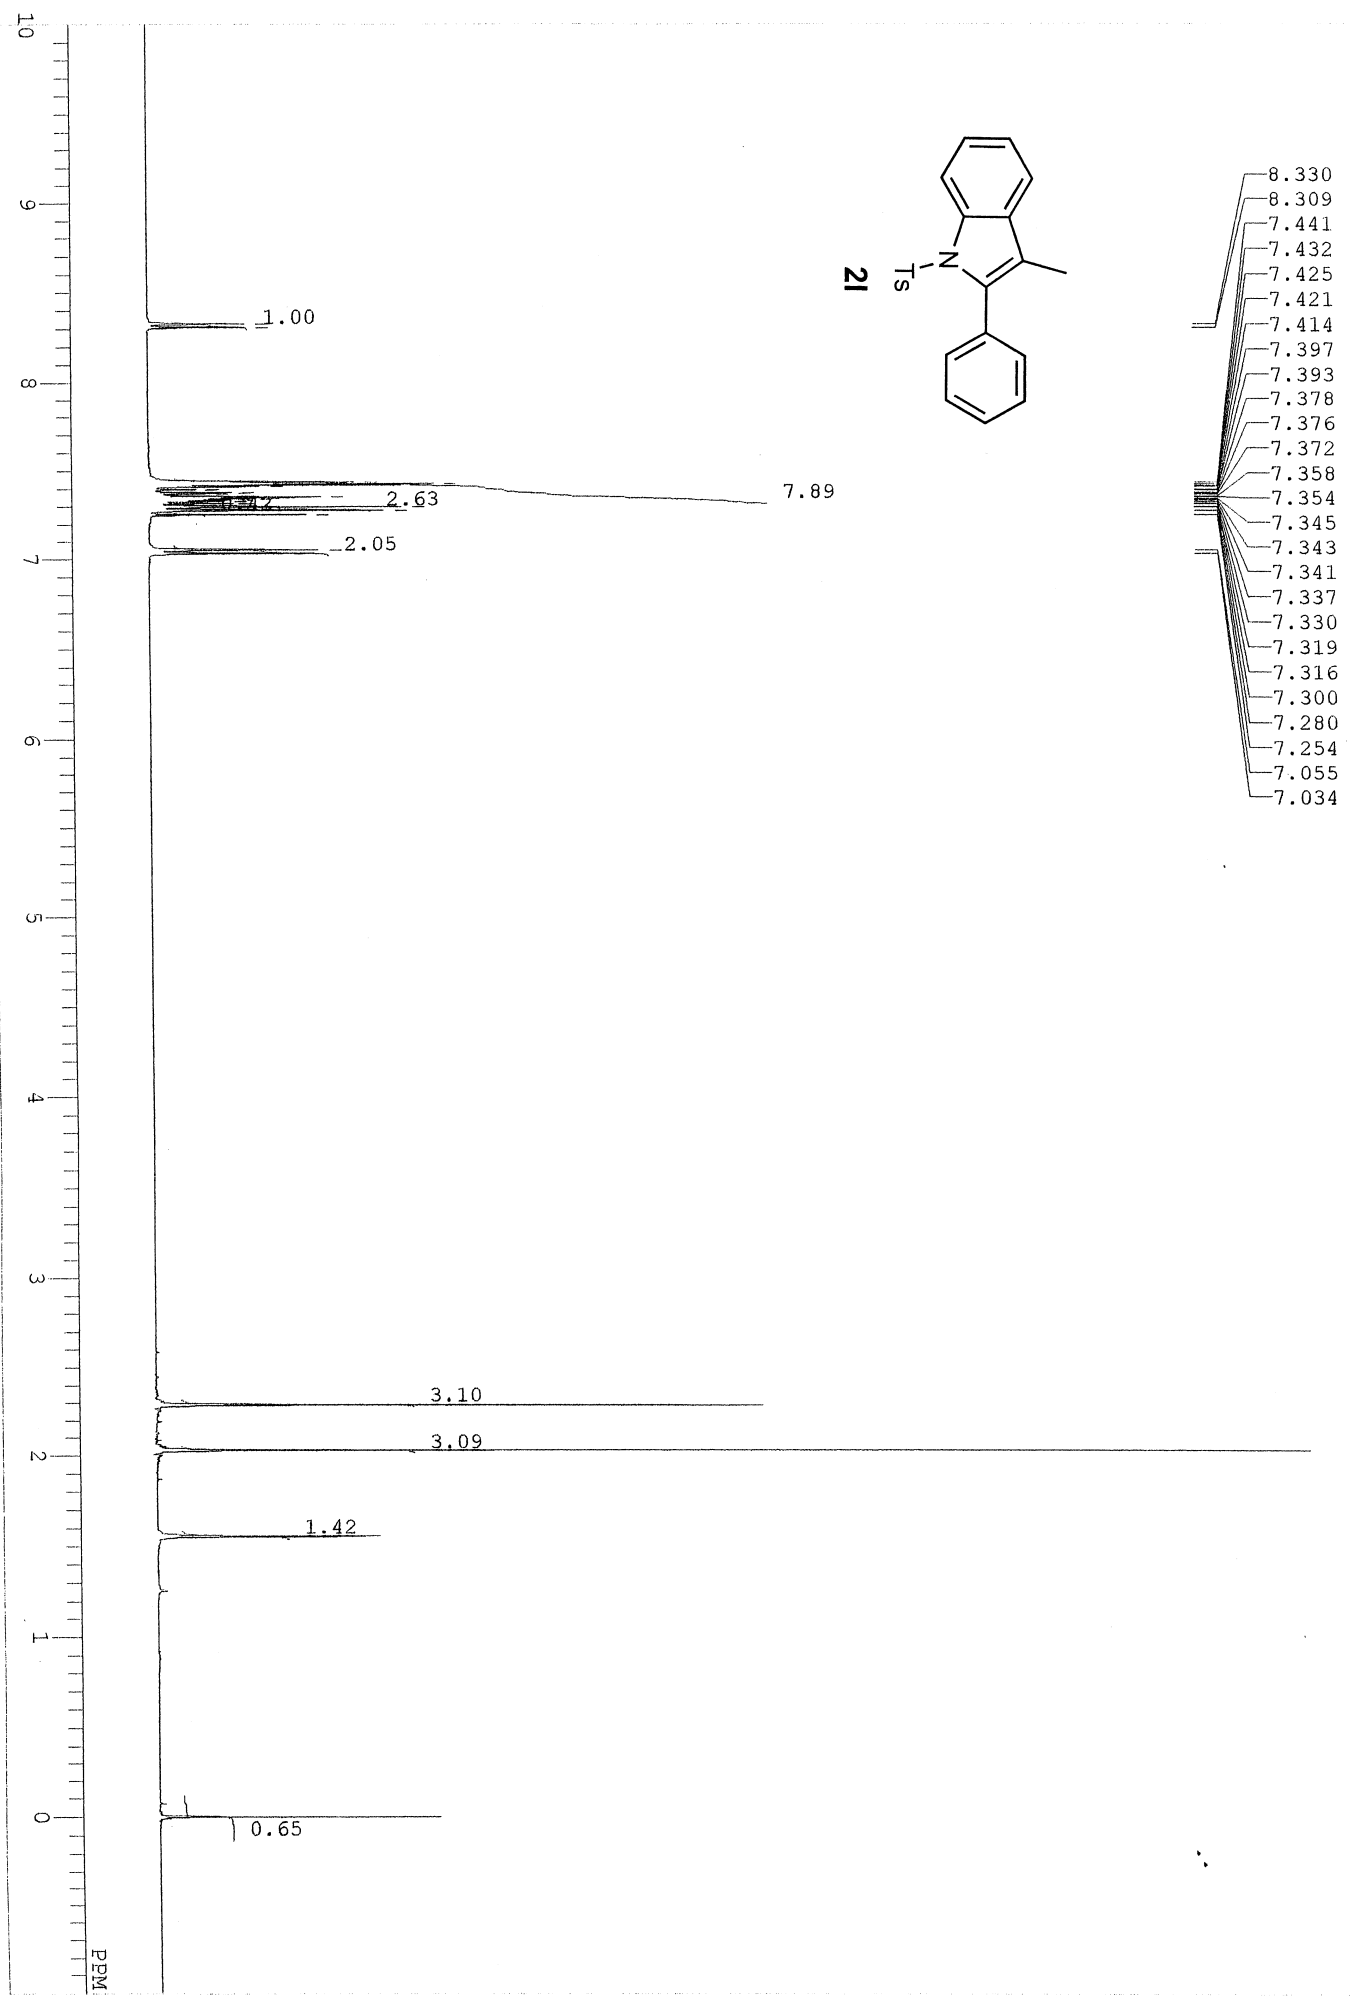

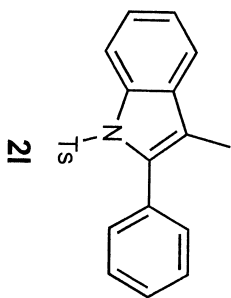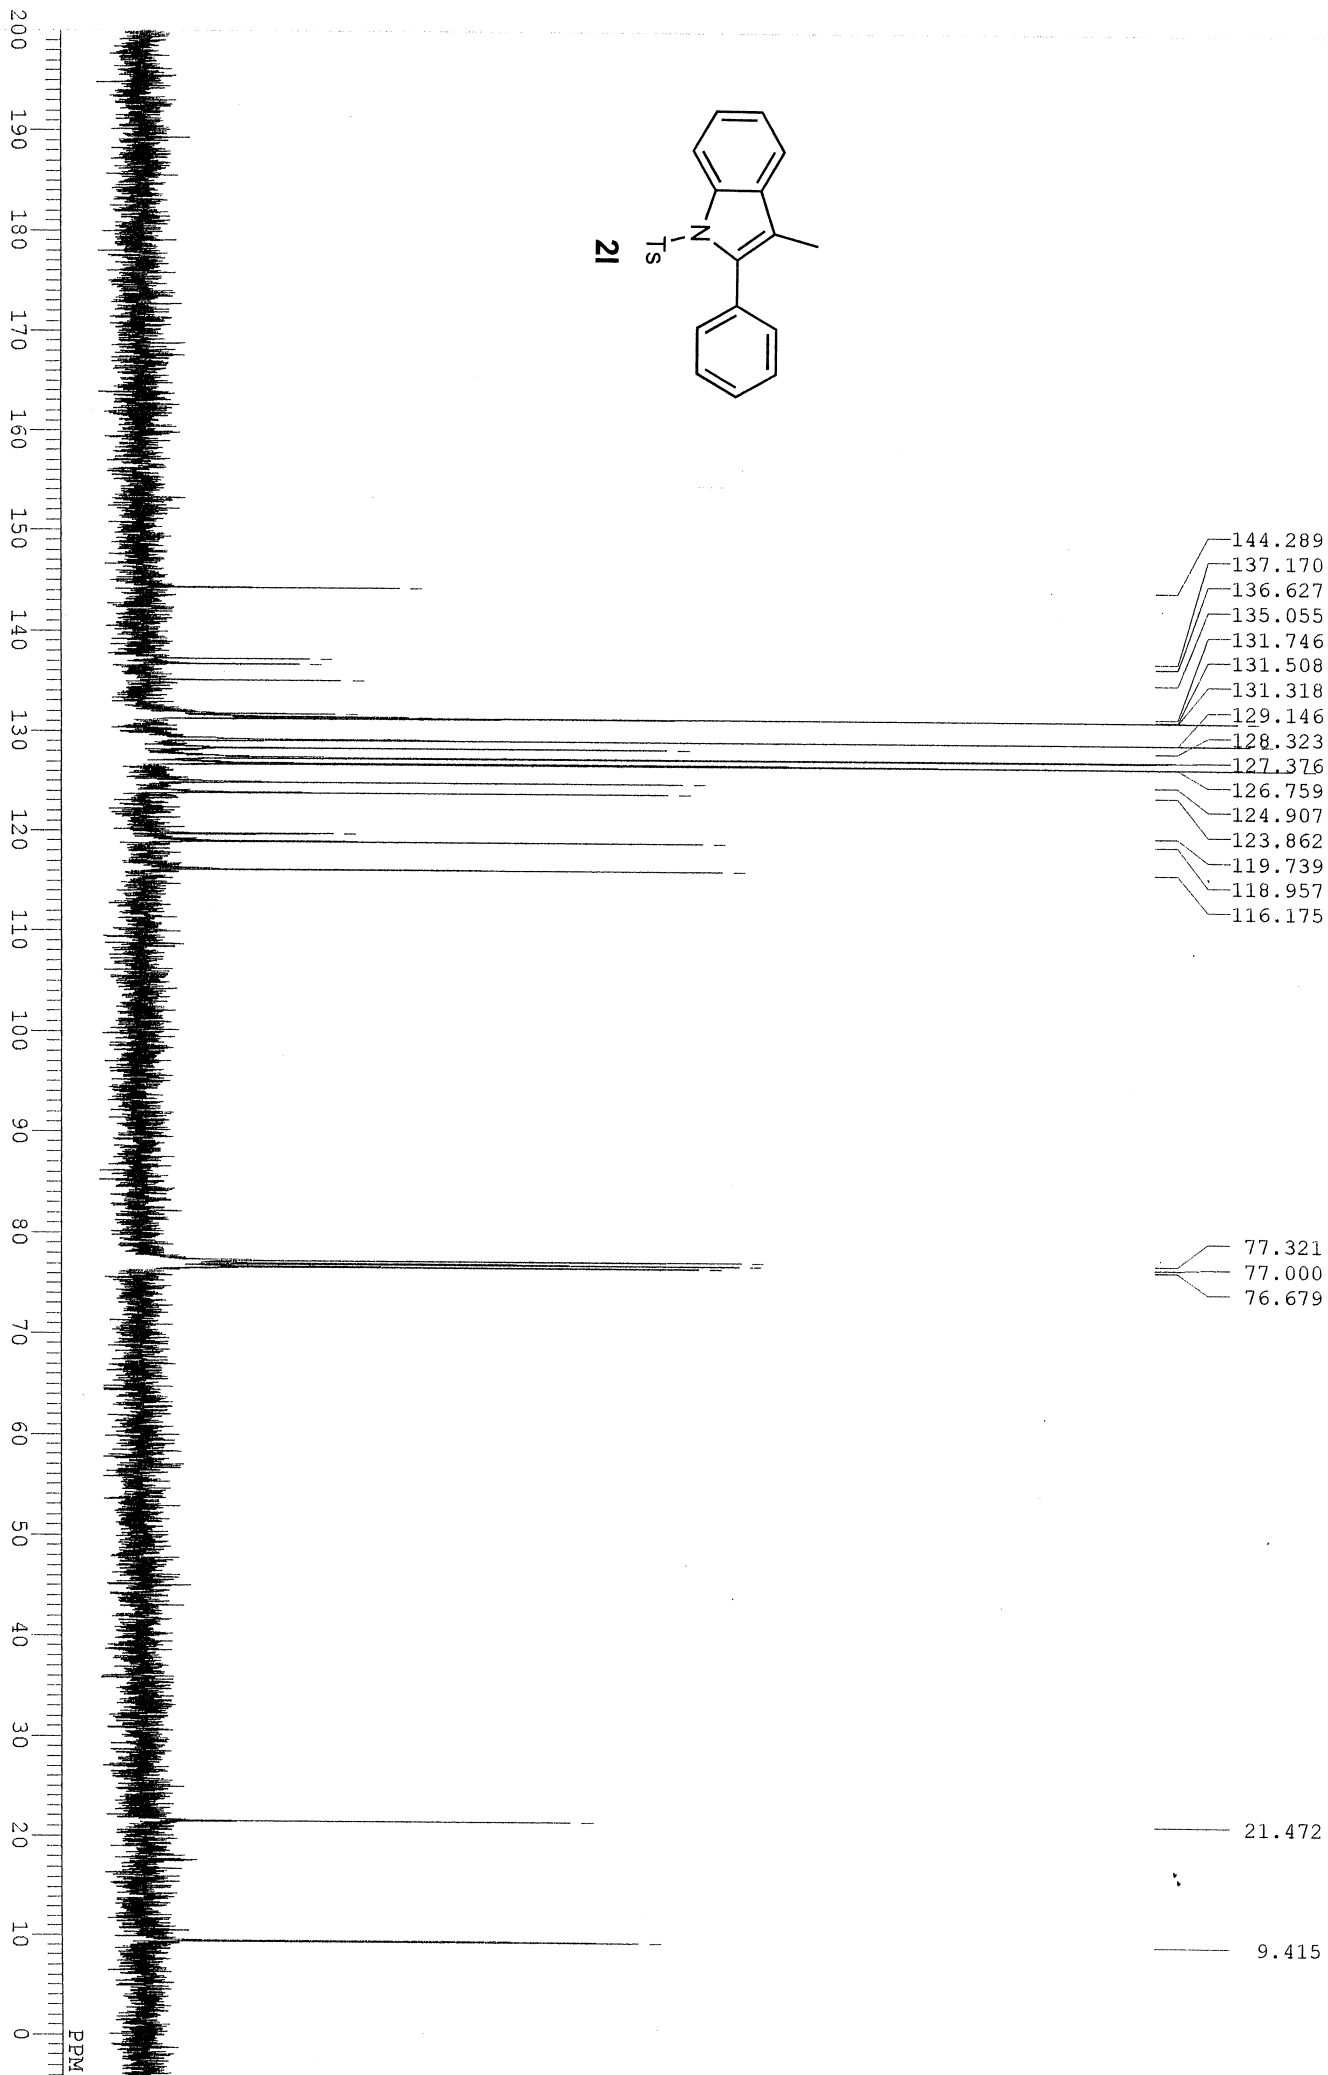

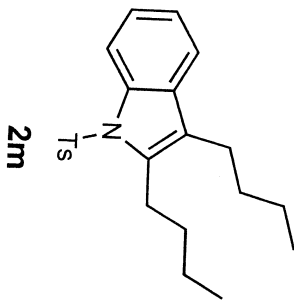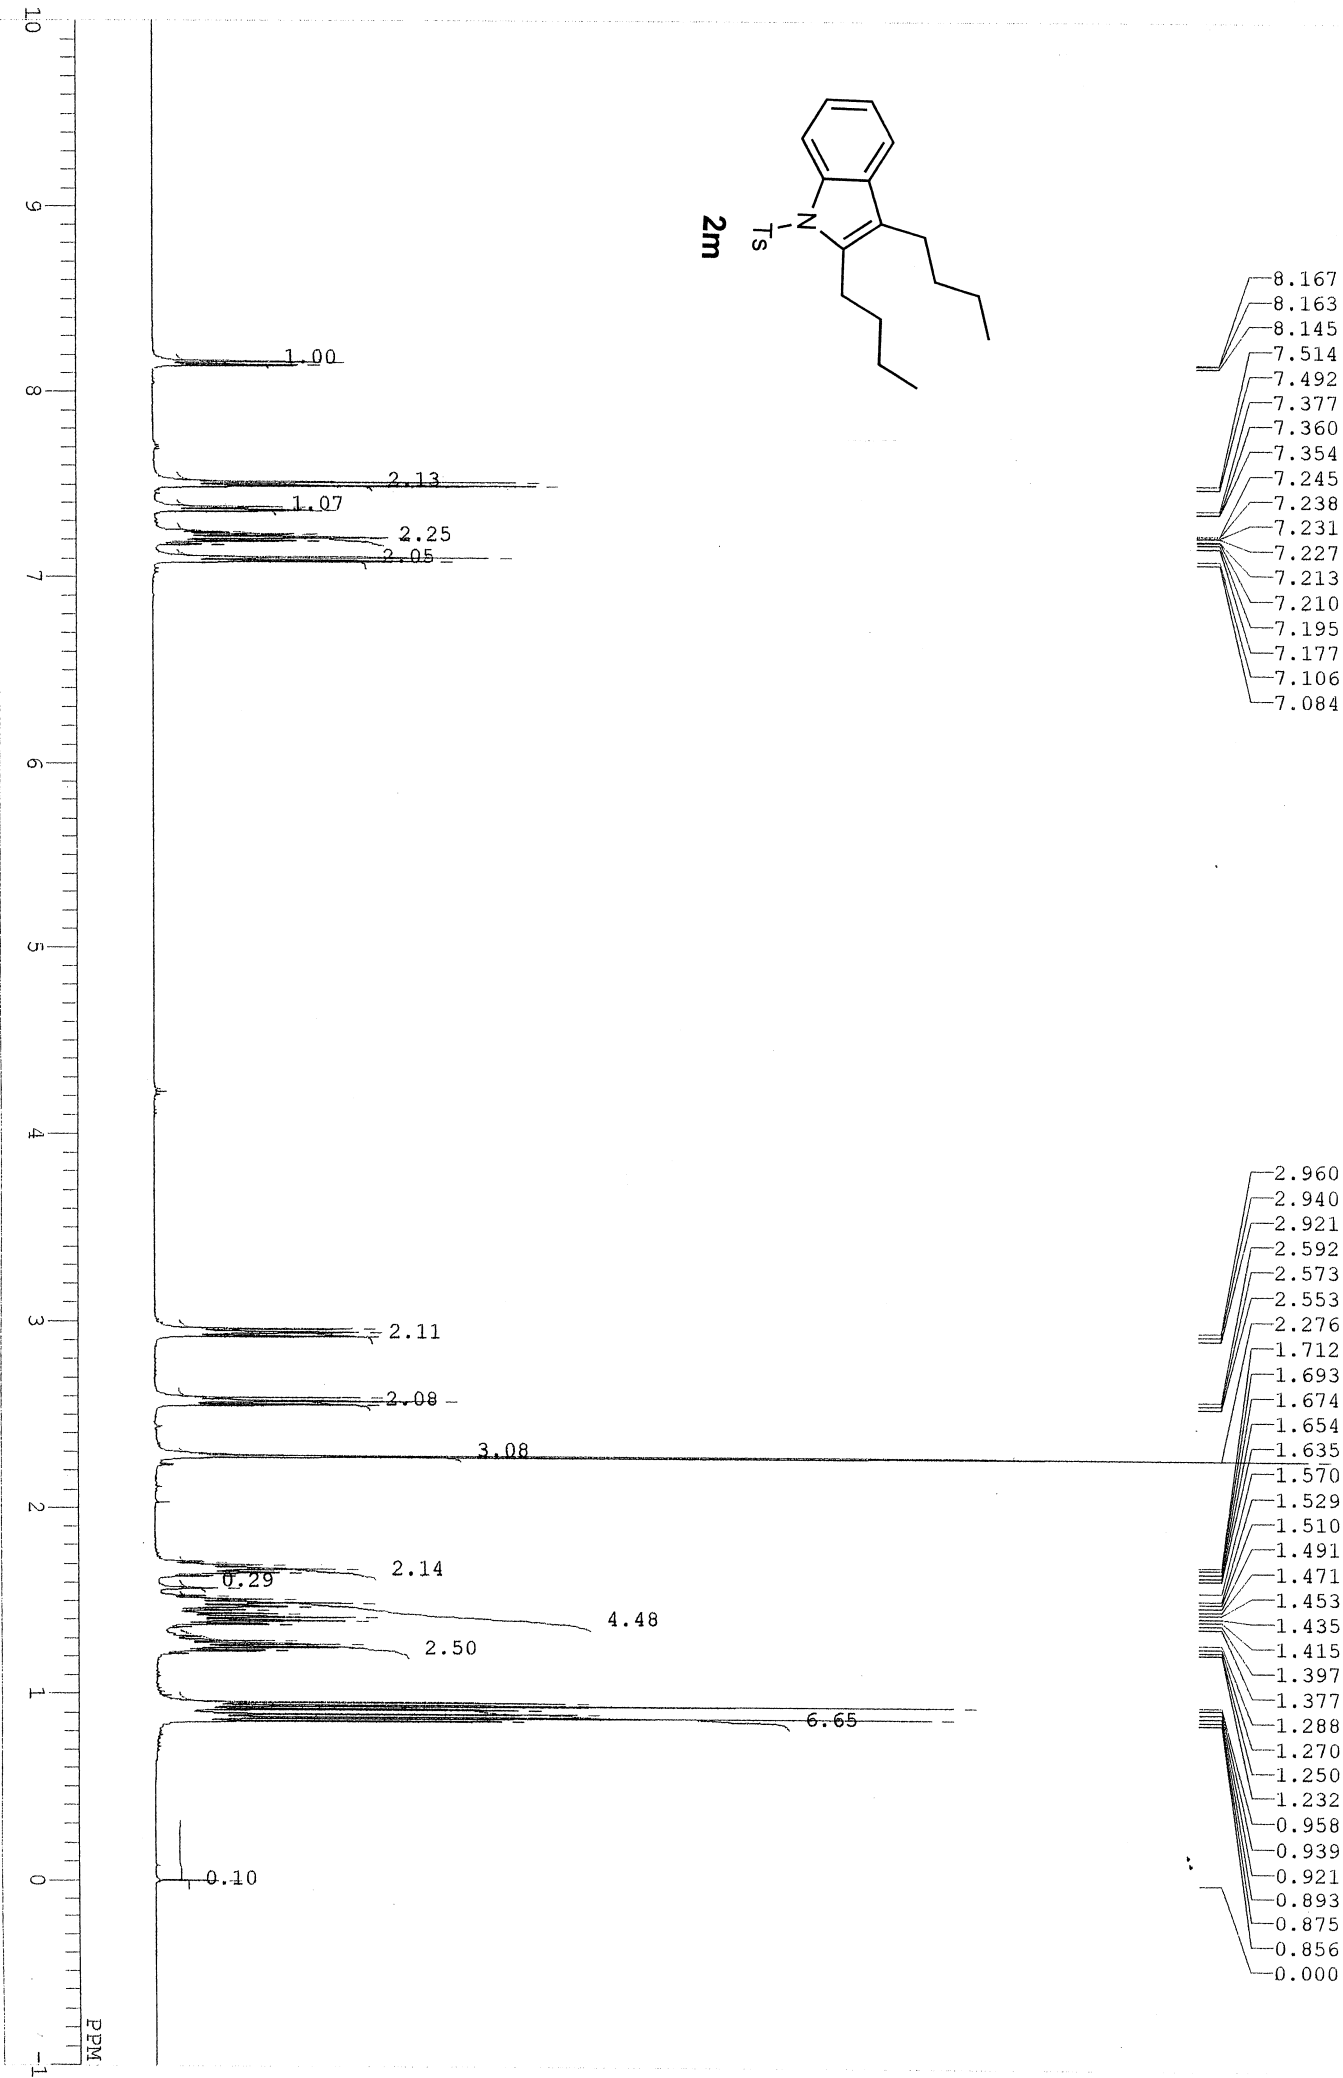

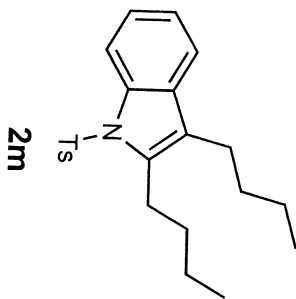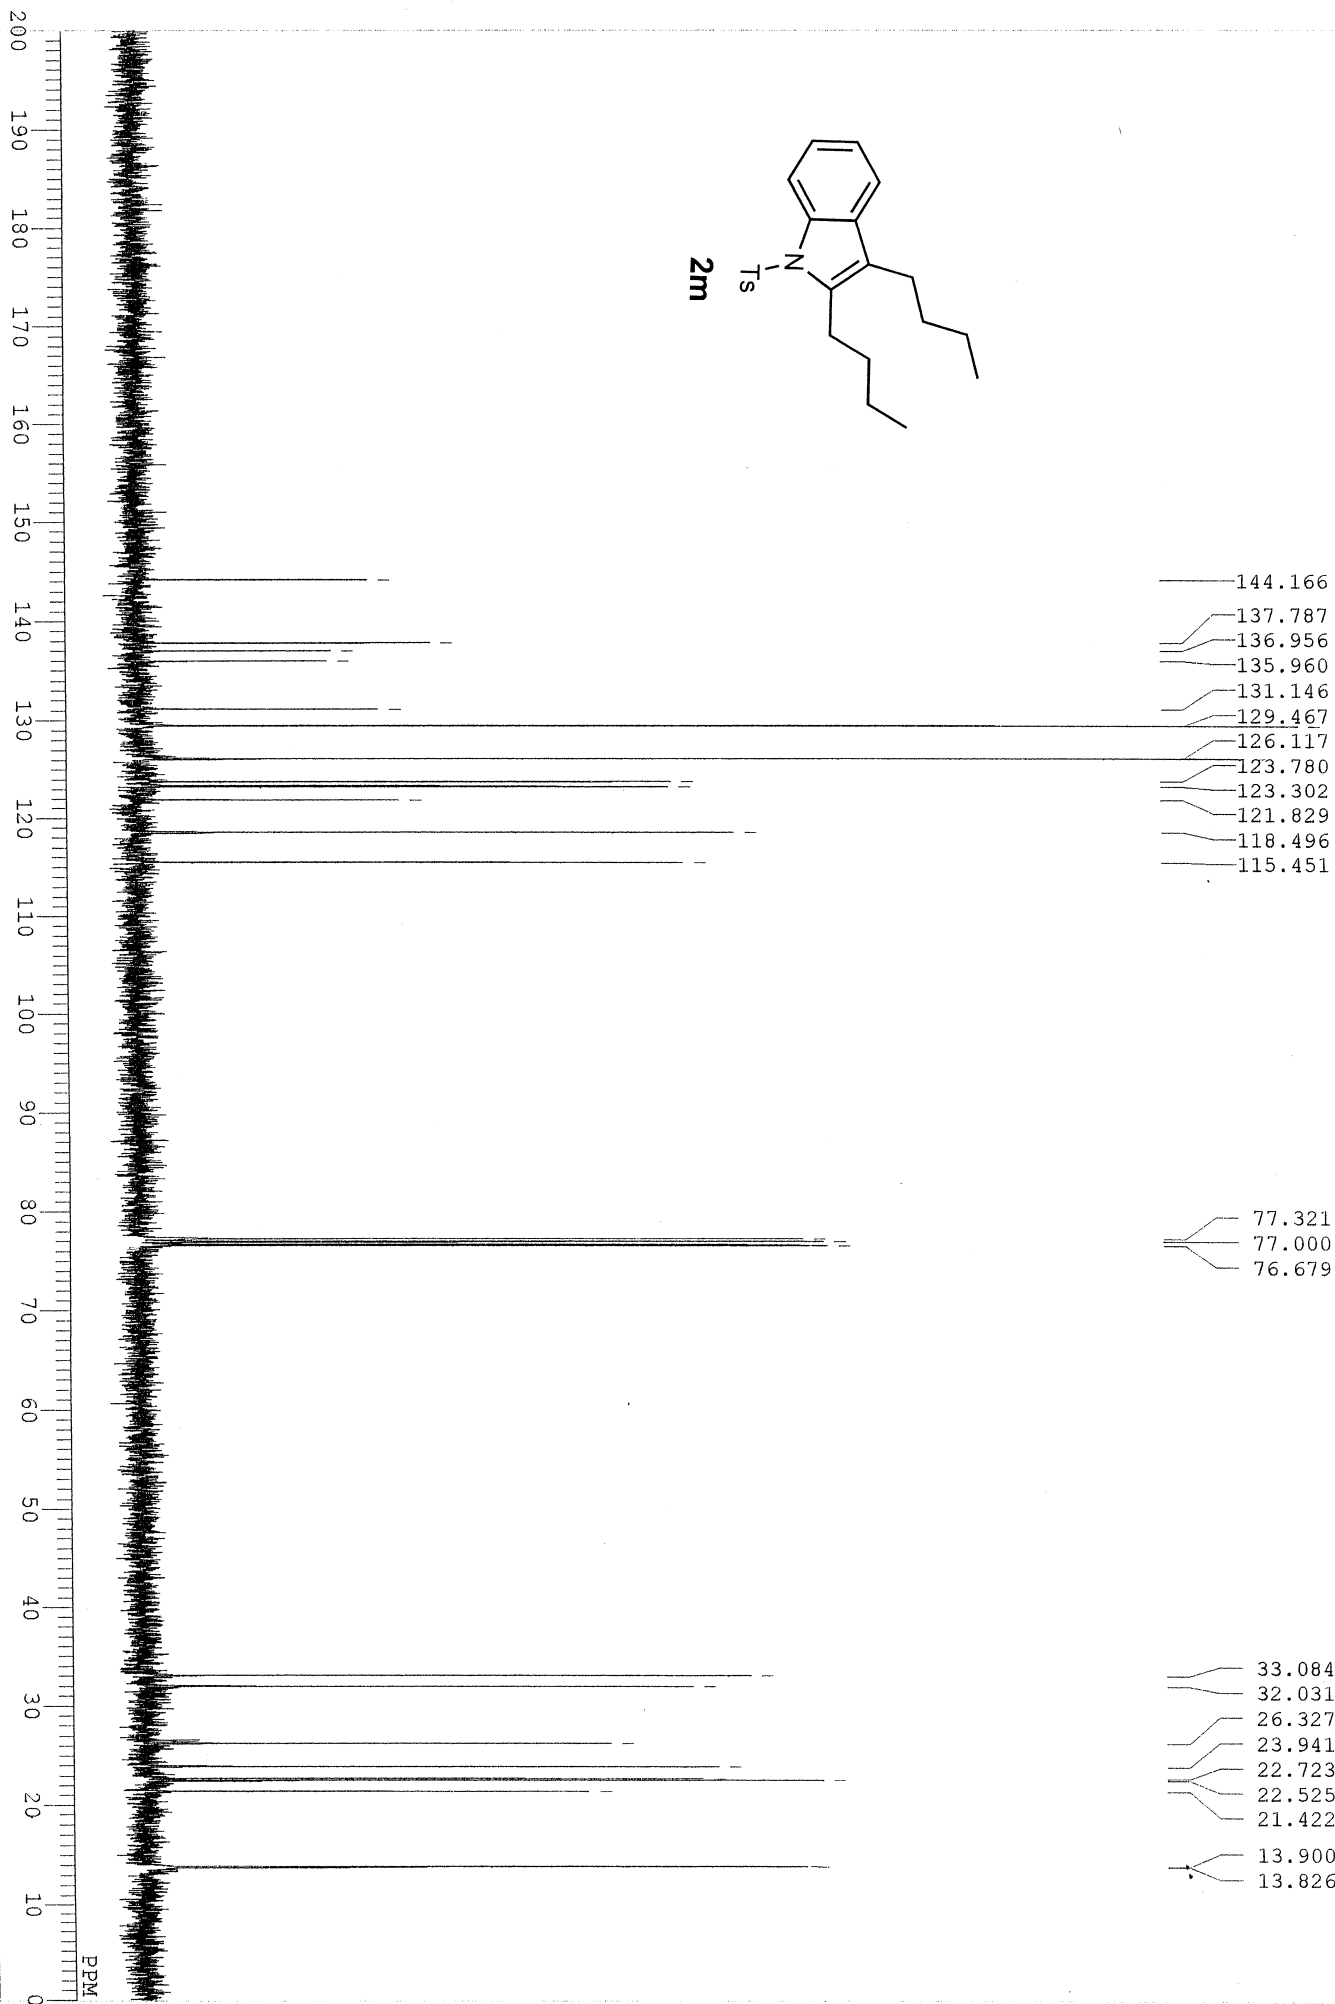

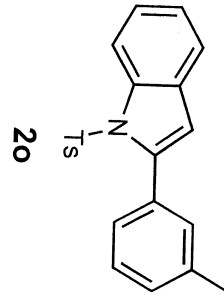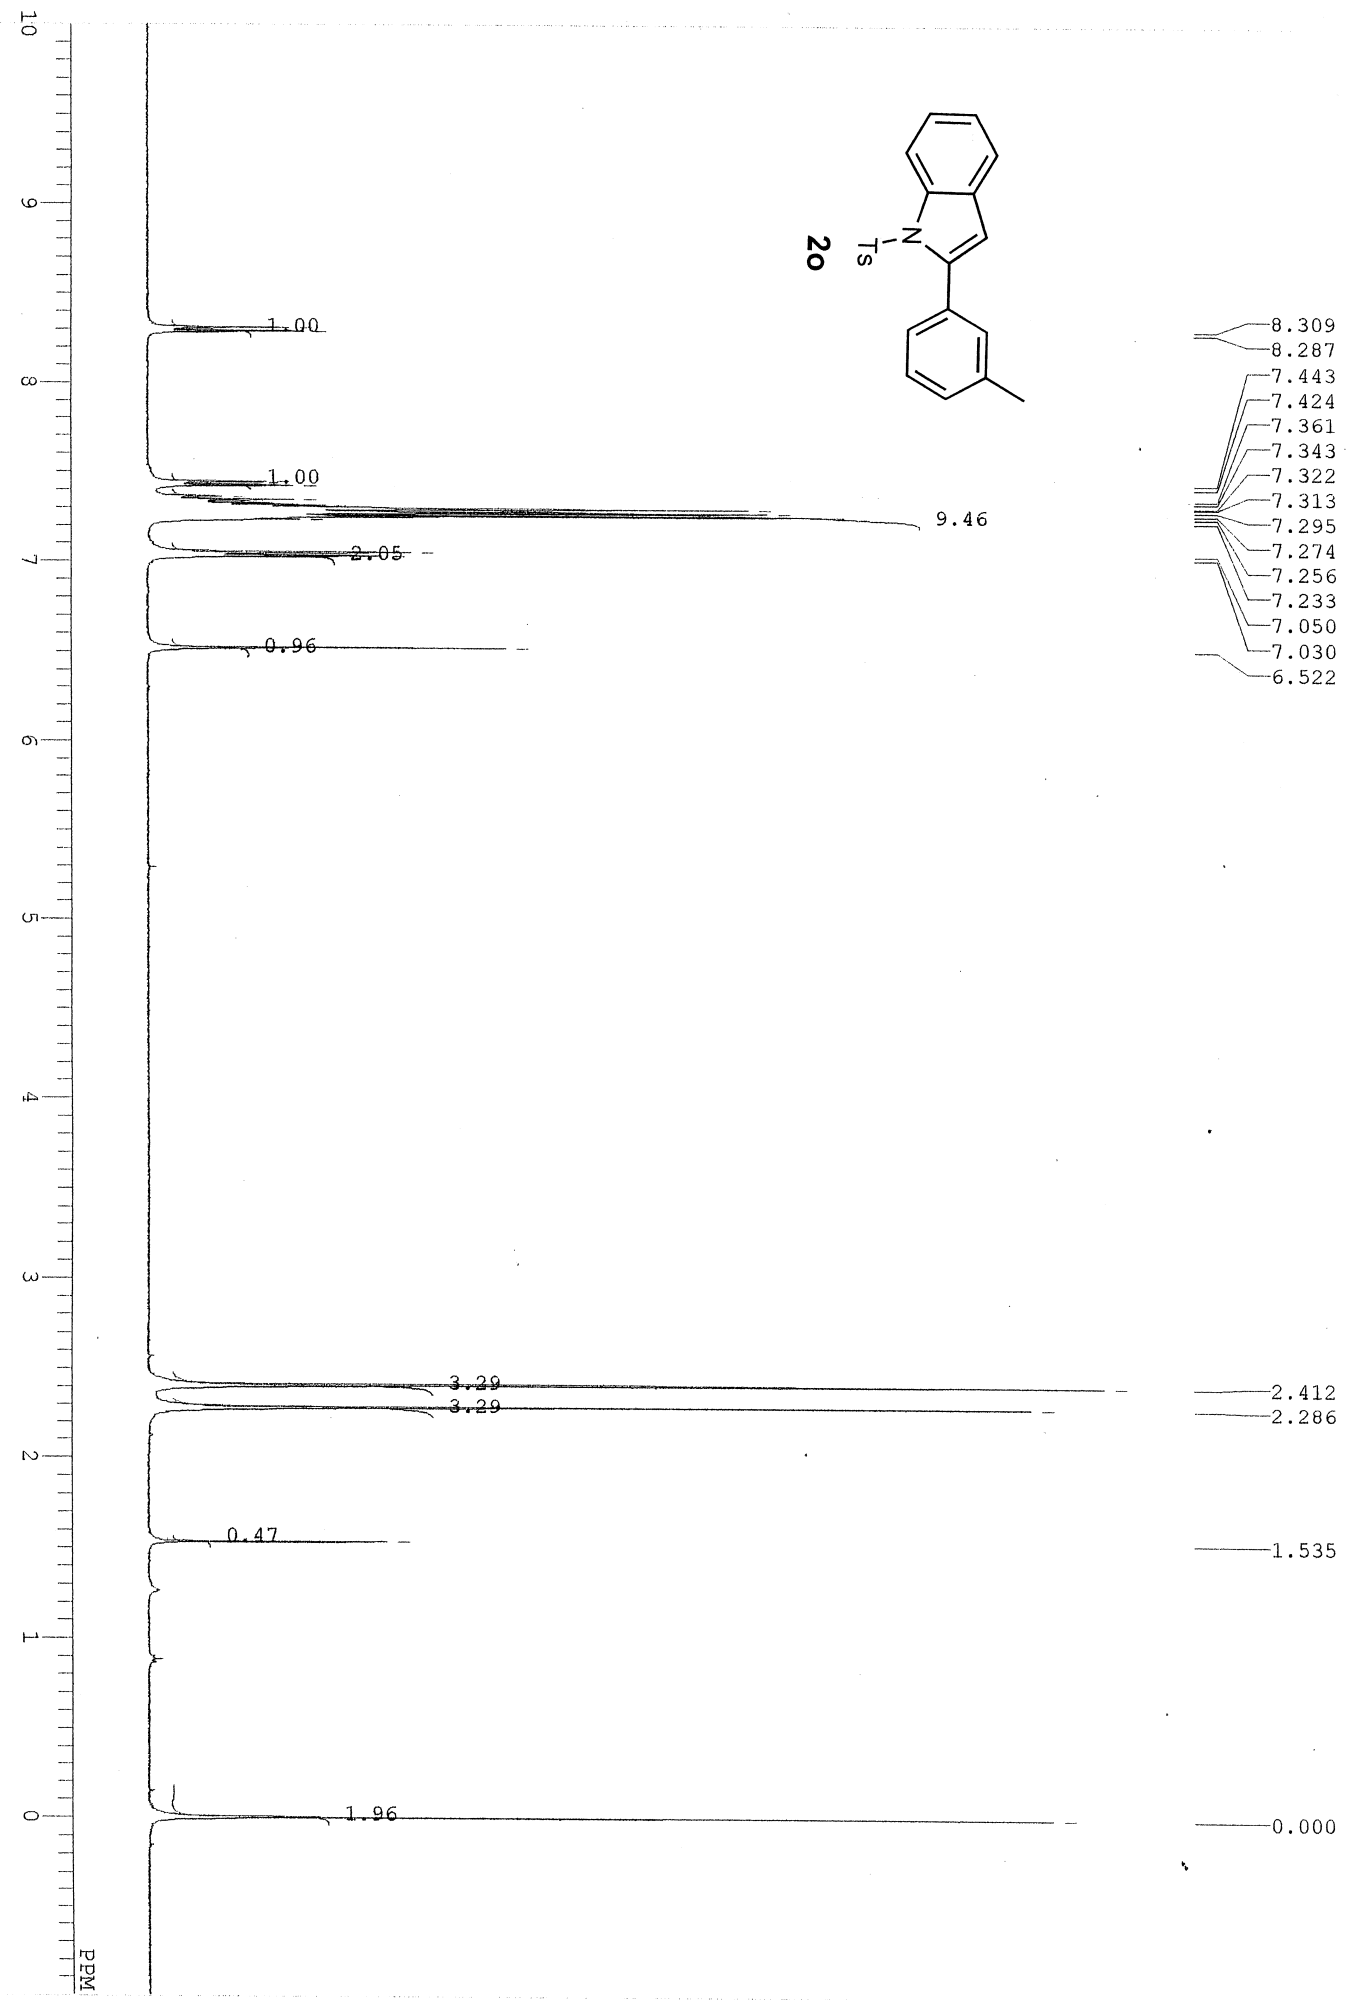

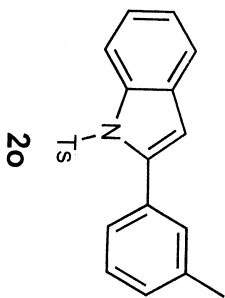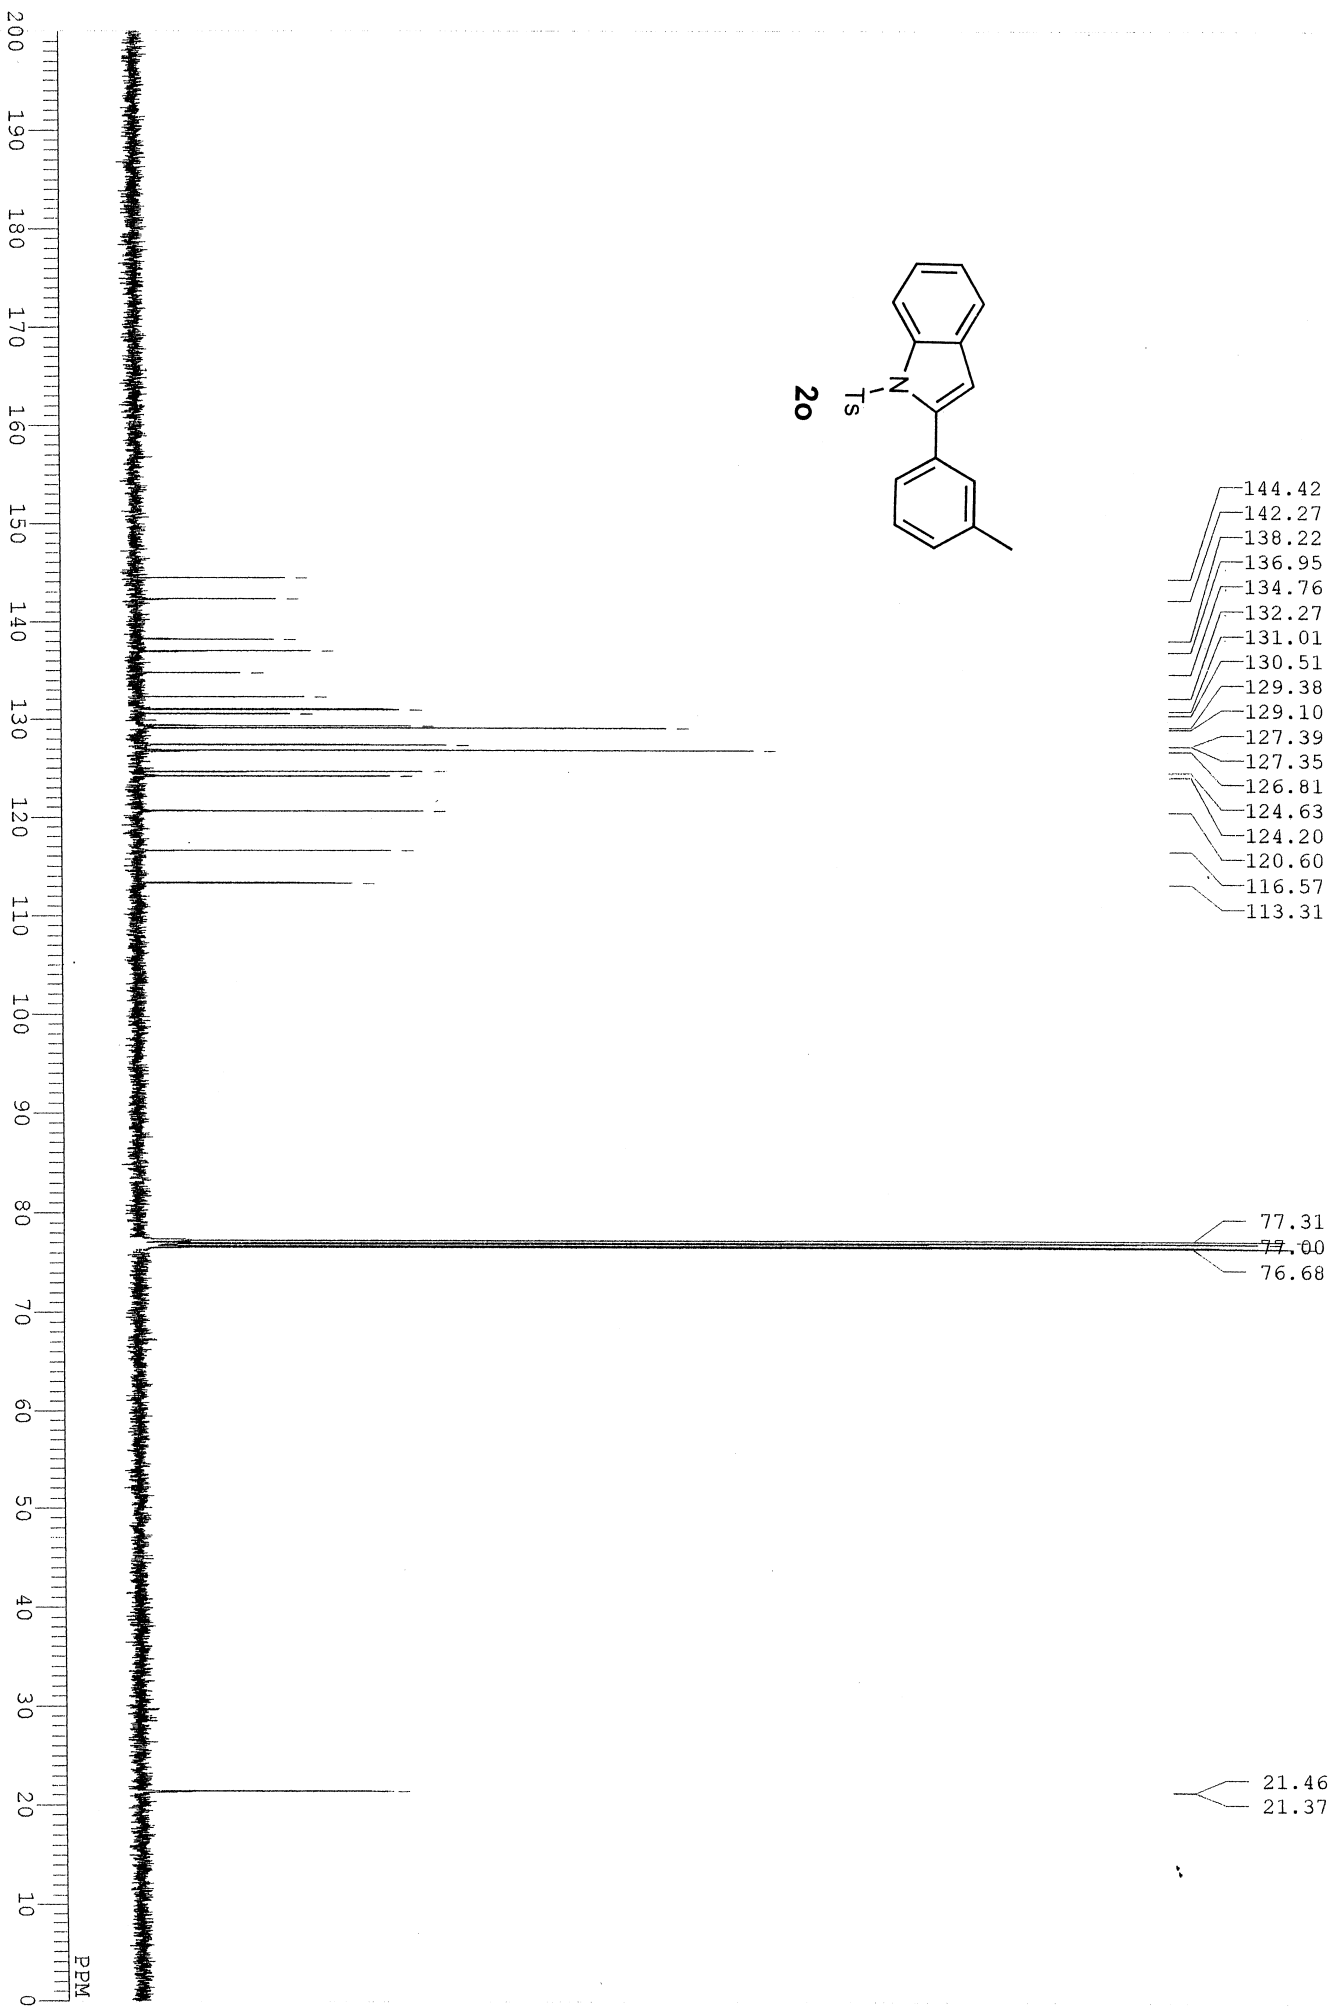

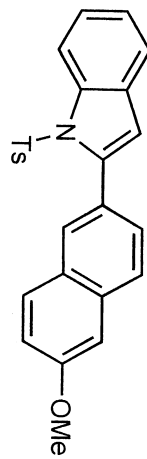

2r

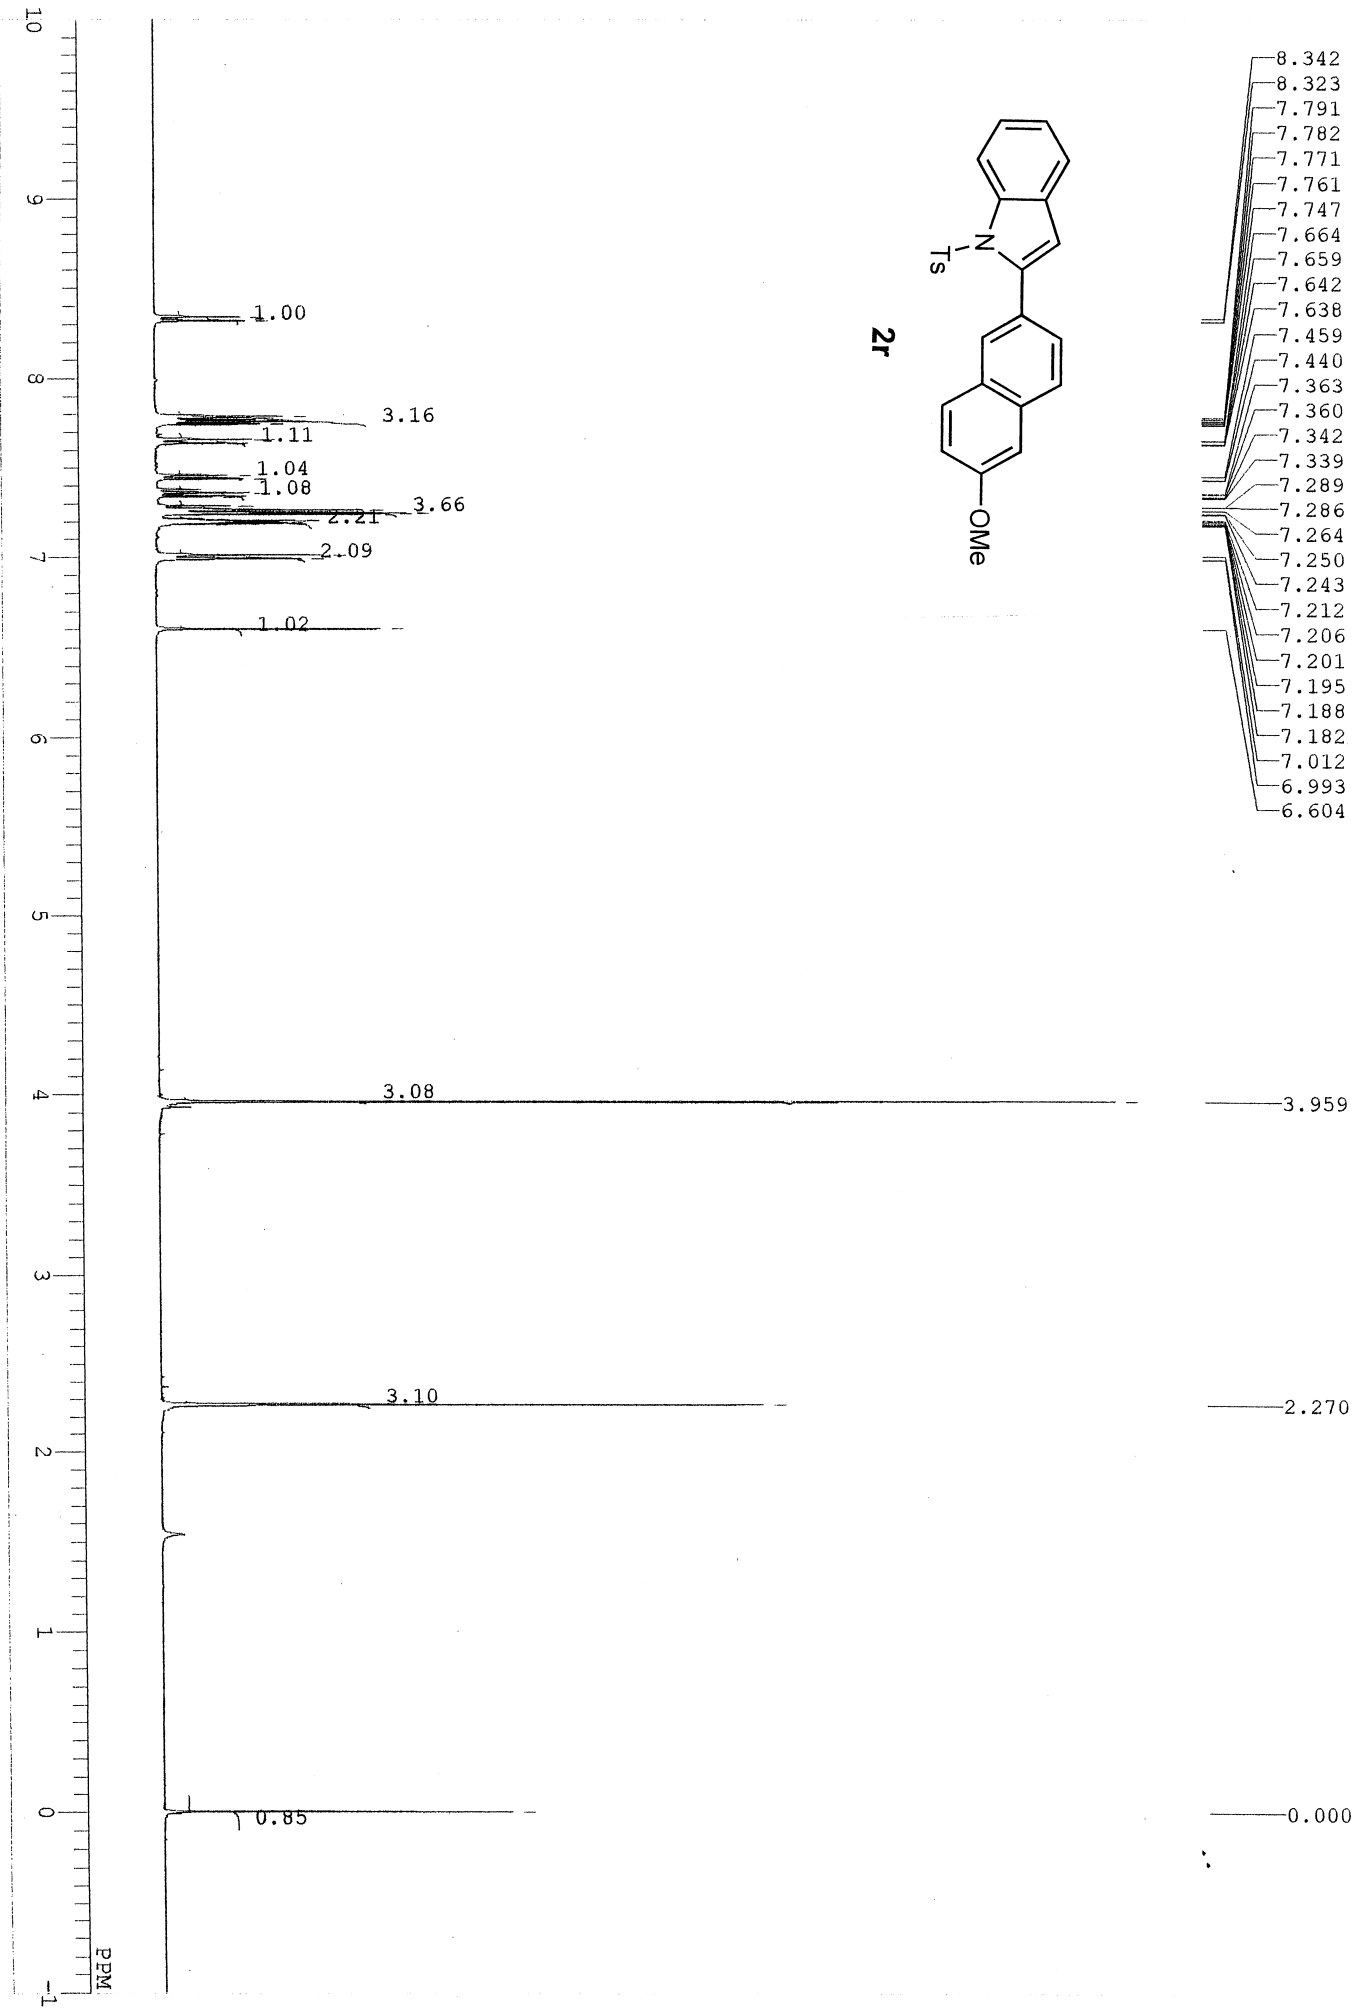



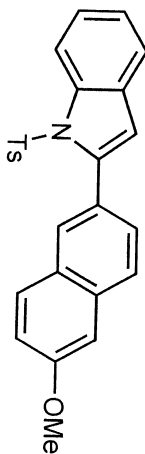

2r

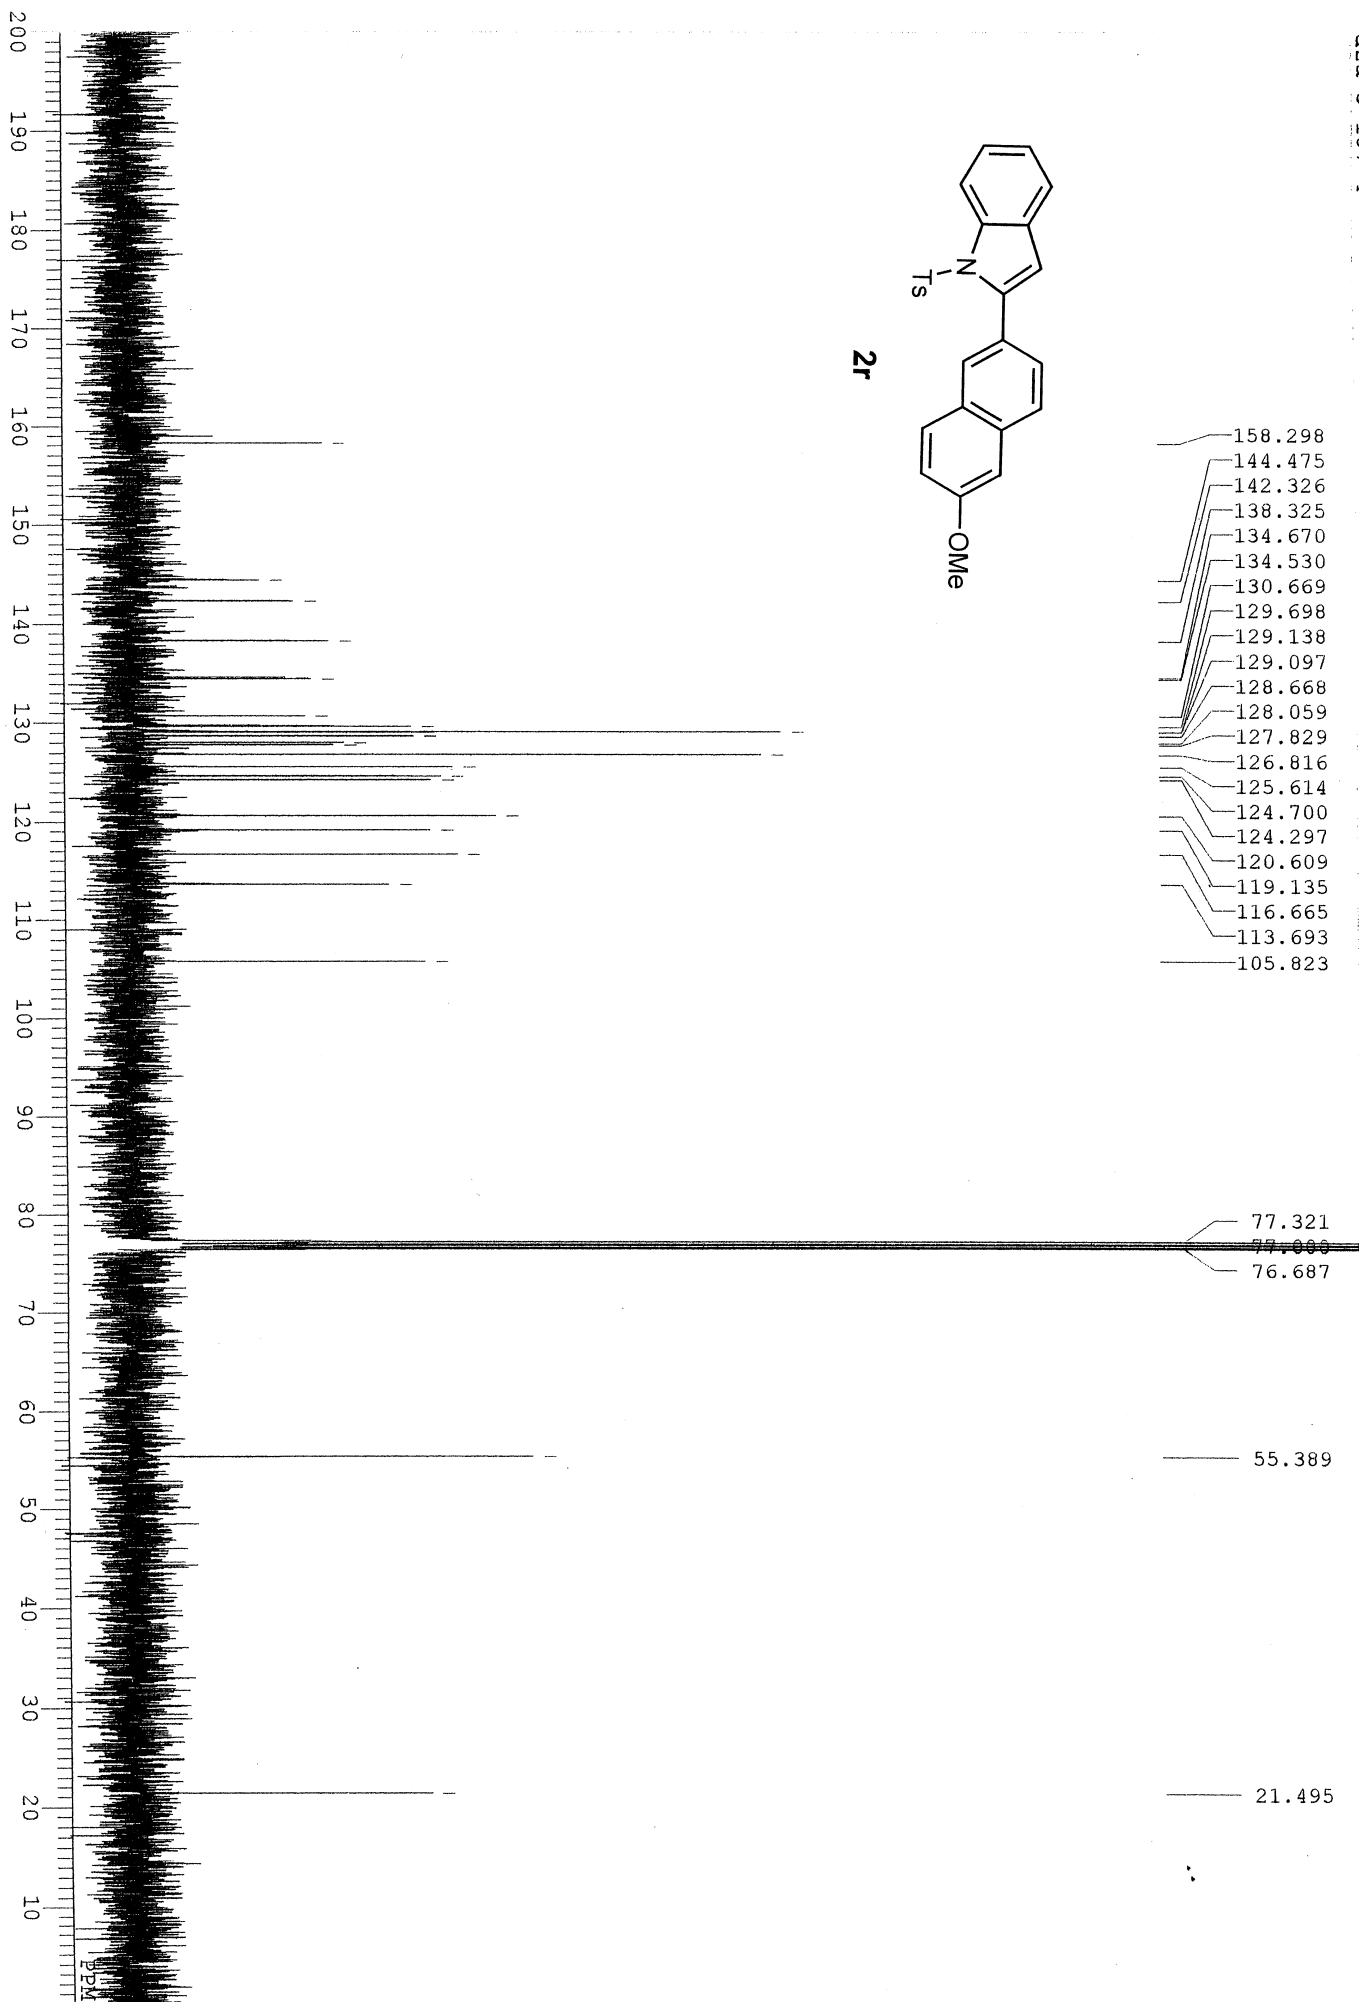

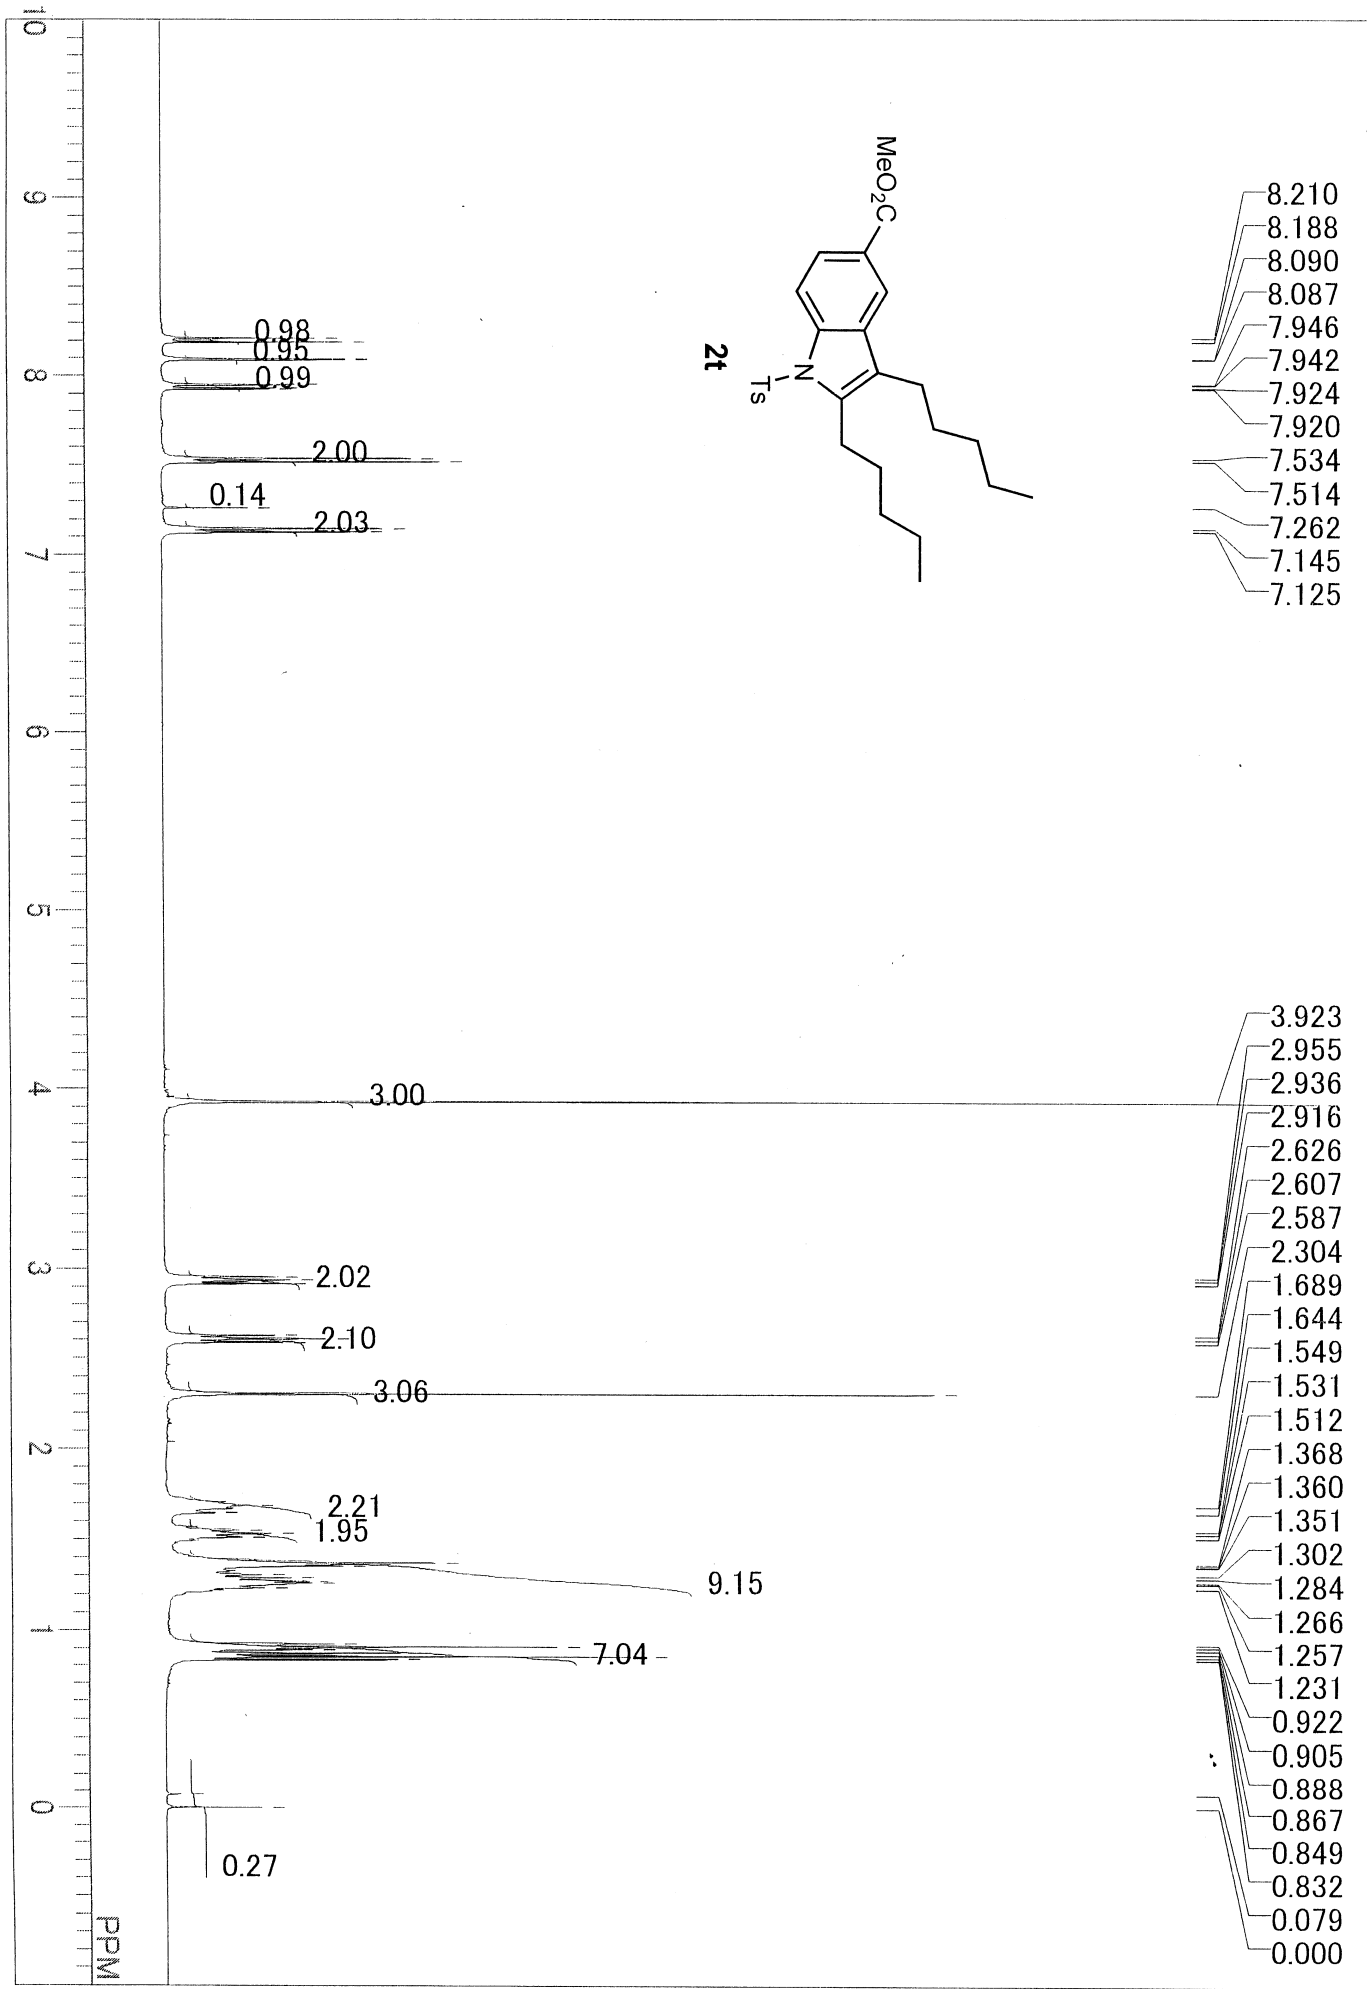

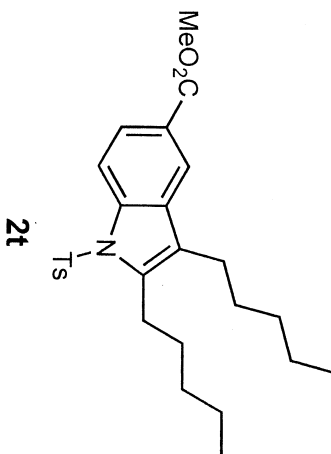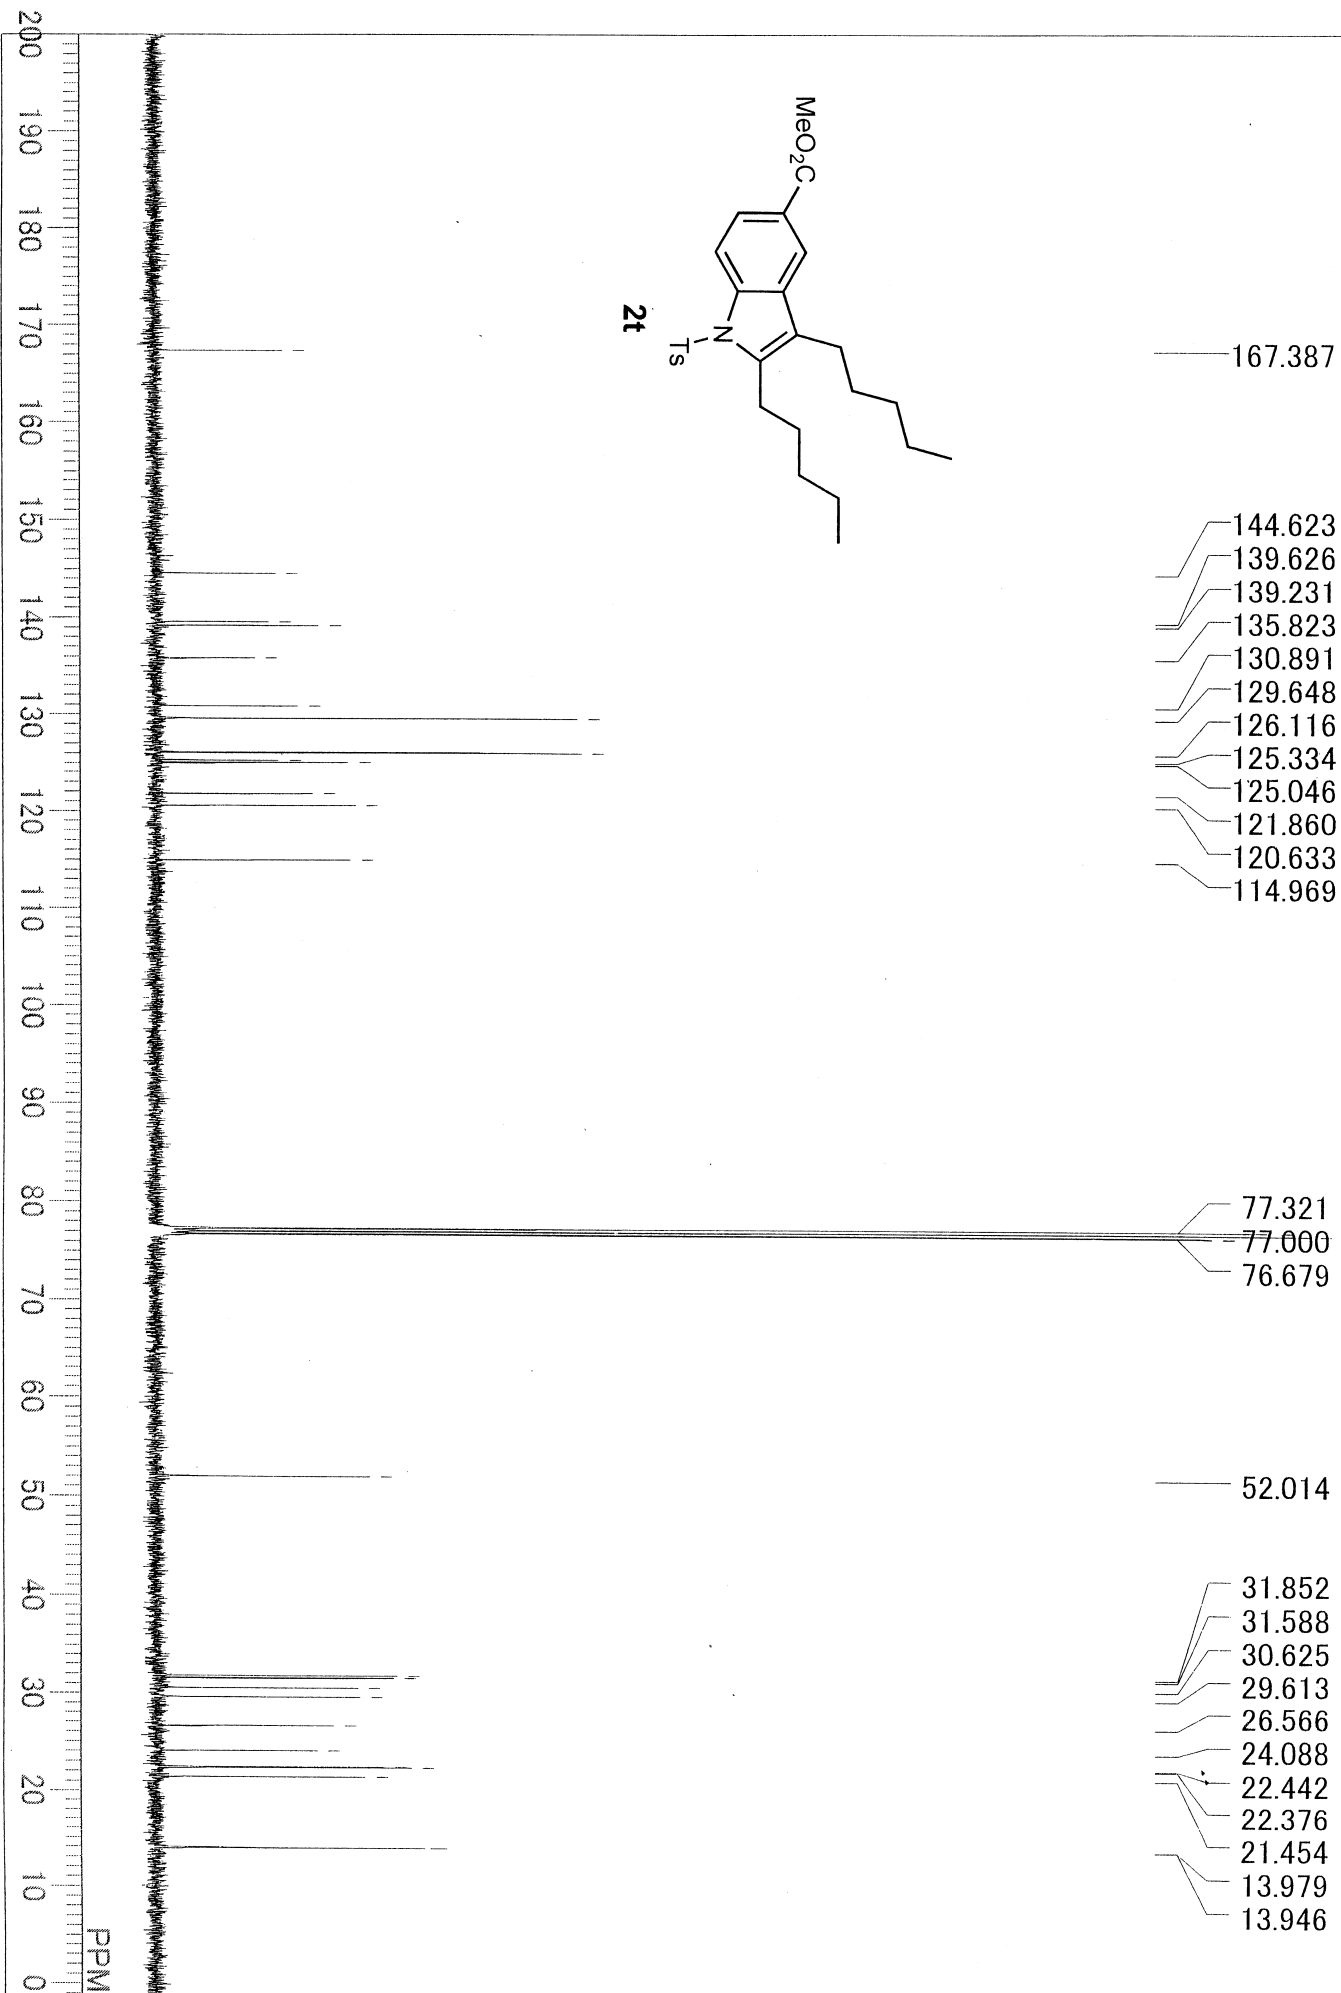

Supplement: c004939e.pdf [file c004939e.pdf]
